# Supplementary material for: Antiprotozoal Activity Against Entamoeba histolytica of Flavonoids Isolated from Lippia graveolens Kunth
Source: PubMed Central journal article supplement (PMC7321152; doi:10.3390/molecules25112464), 2020-05-26
Supplement: molecules-25-02464-s001.pdf [file molecules-25-02464-s001.pdf]

## Figures with supplementary spectroscopic data

### Flavonoids with Antiprotozoal activity against *Entamoeba histolytica* isolated from *Lippia graveolens* Kunth (Mexican oregano)

\*Ramiro Quintanilla-Licea<sup>1</sup>, Javier Vargas-Villarreal<sup>2</sup>, María Julia Verde-Star<sup>1</sup>, Verónica Mayela Rivas-Galindo<sup>3</sup>, Ángel David Torres-Hernández<sup>1</sup>

<sup>1</sup>Universidad Autónoma de Nuevo León (UANL), Facultad de Ciencias Biológicas, Av. Universidad S/N, Cd. Universitaria, San Nicolás de los Garza, C.P. 66455 Nuevo León, Mexico; <sup>2</sup>Centro de Investigaciones Biomédicas del Noreste (CIBIN), Laboratorio de Bioquímica y Biología Celular, Dos de abril esquina con San Luis Potosí, C.P. 64720 Monterrey, Mexico; <sup>3</sup>Universidad Autónoma de Nuevo León (UANL), Facultad de Medicina, Madero y Aguirre Pequeño, Mitras Centro, Monterrey, C.P. 64460 Nuevo León, Mexico

\*Corresponding author: [Ramiro.quintanillalc@uanl.edu.mx](mailto:Ramiro.quintanillalc@uanl.edu.mx)

| Table of Contents                                                                                                                                                          | Page |
|----------------------------------------------------------------------------------------------------------------------------------------------------------------------------|------|
| <b>S1:</b> <sup>1</sup> H-NMR Spectrum of Pinocembrin ( <b>1</b> ) <i>d</i> <sub>6</sub> -DMSO, 400 MHz.....                                                               | 3    |
| <b>S2:</b> <sup>1</sup> H-NMR Spectrum (Ext. 7.5 – 2.5 ppm) of Pinocembrin ( <b>1</b> ) <i>d</i> <sub>6</sub> -DMSO, 400 MHz.....                                          | 4    |
| <b>S3:</b> COSY Spectrum of Pinocembrin ( <b>1</b> ) <i>d</i> <sub>6</sub> -DMSO, 400 MHz.....                                                                             | 5    |
| <b>S4:</b> <sup>13</sup> C-NMR Spectrum of Pinocembrin ( <b>1</b> ) ( <i>d</i> <sub>6</sub> -DMSO, 100 MHz).....                                                           | 6    |
| <b>S5:</b> DEPT-135 Spectrum of Pinocembrin ( <b>1</b> ) ( <i>d</i> <sub>6</sub> -DMSO, 100 MHz).....                                                                      | 7    |
| <b>S6:</b> HSQC Spectrum (Ext. <sup>1</sup> H: 2.0-8.2 ppm; <sup>13</sup> C: 40-170 ppm) of Pinocembrin ( <b>1</b> ) ( <i>d</i> <sub>6</sub> -DMSO, 400 MHz, 100 MHz)..... | 8    |
| <b>S7:</b> <sup>1</sup> H-NMR Spectrum of Sakuranetin ( <b>2</b> ) <i>d</i> <sub>6</sub> -DMSO, 400 MHz.....                                                               | 9    |
| <b>S8:</b> <sup>1</sup> H-NMR Spectrum (Ext. 6.4 – 8.0 ppm) of Sakuranetin ( <b>2</b> ) <i>d</i> <sub>6</sub> -DMSO, 400 MHz.....                                          | 10   |

|                                                                                                                                                              |    |
|--------------------------------------------------------------------------------------------------------------------------------------------------------------|----|
| <b>S9:</b> $^1\text{H}$ -NMR Spectrum (Ext. 2.5 – 4.0 ppm) of Sakuranetin ( <b>2</b> ) $d_6$ -DMSO, 400 MHz.....                                             | 11 |
| <b>S10:</b> COSY Spectrum of Sakuranetin ( <b>2</b> ) $d_6$ -DMSO, 400 MHz.....                                                                              | 12 |
| <b>S11:</b> $^{13}\text{C}$ -NMR Spectrum of Sakuranetin ( <b>2</b> ) ( $d_6$ -DMSO, 100 MHz).....                                                           | 13 |
| <b>S12:</b> DEPT-135 Spectrum of Sakuranetin ( <b>2</b> ) ( $d_6$ -DMSO, 100 MHz).....                                                                       | 14 |
| <b>S13:</b> HSQC Spectrum (Ext. $^1\text{H}$ : 2.0-7.6 ppm; $^{13}\text{C}$ : 40-140 ppm) of Sakuranetin ( <b>2</b> ) ( $d_6$ -DMSO, 400 MHz, 100 MHz).....  | 15 |
| <b>S14:</b> $^1\text{H}$ -NMR Spectrum of Cirsimaritin ( <b>3</b> ) $d_6$ -DMSO, 400 MHz.....                                                                | 16 |
| <b>S15:</b> $^1\text{H}$ -NMR Spectrum (Ext. 6.8 – 8.0 ppm) of Cirsimaritin ( <b>3</b> ) $d_6$ -DMSO, 400 MHz.....                                           | 17 |
| <b>S16:</b> COSY Spectrum of Cirsimaritin ( <b>3</b> ) $d_6$ -DMSO, 400 MHz.....                                                                             | 18 |
| <b>S17:</b> COSY Spectrum (Ext $^1\text{H}$ : 5.0-9.4 ppm; $^1\text{H}$ : 5.0-9.4 ppm ) of Cirsimaritin ( <b>3</b> ) $d_6$ -DMSO, 400 MHz.....               | 19 |
| <b>S18:</b> $^{13}\text{C}$ -NMR Spectrum of Cirsimaritin ( <b>3</b> ) ( $d_6$ -DMSO, 100 MHz).....                                                          | 20 |
| <b>S19:</b> HSQC Spectrum (Ext. $^1\text{H}$ : 6.2-8.4 ppm; $^{13}\text{C}$ : 85-145 ppm) of Cirsimaritin ( <b>3</b> ) ( $d_6$ -DMSO, 400 MHz, 100 MHz)..... | 21 |
| <b>S20:</b> $^1\text{H}$ -NMR Spectrum of Naringenin ( <b>4</b> ) $d_6$ -DMSO, 400 MHz.....                                                                  | 22 |
| <b>S21:</b> $^1\text{H}$ -NMR Spectrum (Ext. 8.0 – 2.0 ppm) of Naringenin ( <b>4</b> ) $d_6$ -DMSO, 400 MHz.....                                             | 23 |
| <b>S22:</b> COSY Spectrum of Naringenin ( <b>4</b> ) $d_6$ -DMSO, 400 MHz.....                                                                               | 24 |
| <b>S23:</b> $^{13}\text{C}$ -NMR Spectrum of Naringenin ( <b>4</b> ) ( $d_6$ -DMSO, 100 MHz).....                                                            | 25 |
| <b>S24:</b> DEPT-135 Spectrum of Naringenin ( <b>4</b> ) ( $d_6$ -DMSO, 100 MHz).....                                                                        | 26 |
| <b>S25:</b> HSQC Spectrum (Ext. $^1\text{H}$ : 0-9.0 ppm; $^{13}\text{C}$ : 10-180 ppm) of Naringenin ( <b>4</b> ) ( $d_6$ -DMSO, 400 MHz, 100 MHz).....     | 27 |
| <b>S26:</b> IR spectrum of Pinocembrin <b>1</b> .....                                                                                                        | 28 |
| <b>S27:</b> IR spectrum of Sakuranetin <b>2</b> .....                                                                                                        | 29 |
| <b>S28:</b> IR spectrum of Cirsimaritin <b>3</b> .....                                                                                                       | 30 |
| <b>S29:</b> Table 1. $^1\text{H}$ -NMR spectral data of compounds <b>1-4</b> (400 MHz, DMSO- $d_6$ ).....                                                    | 31 |
| <b>S30:</b> Table 2. $^{13}\text{C}$ -NMR spectral data of compounds <b>1-4</b> (100 MHz, DMSO- $d_6$ ).....                                                 | 32 |

S1: <sup>1</sup>H-NMR Spectrum of Pinocembrin (1) *d*<sub>6</sub>-DMSO, 400 MHz

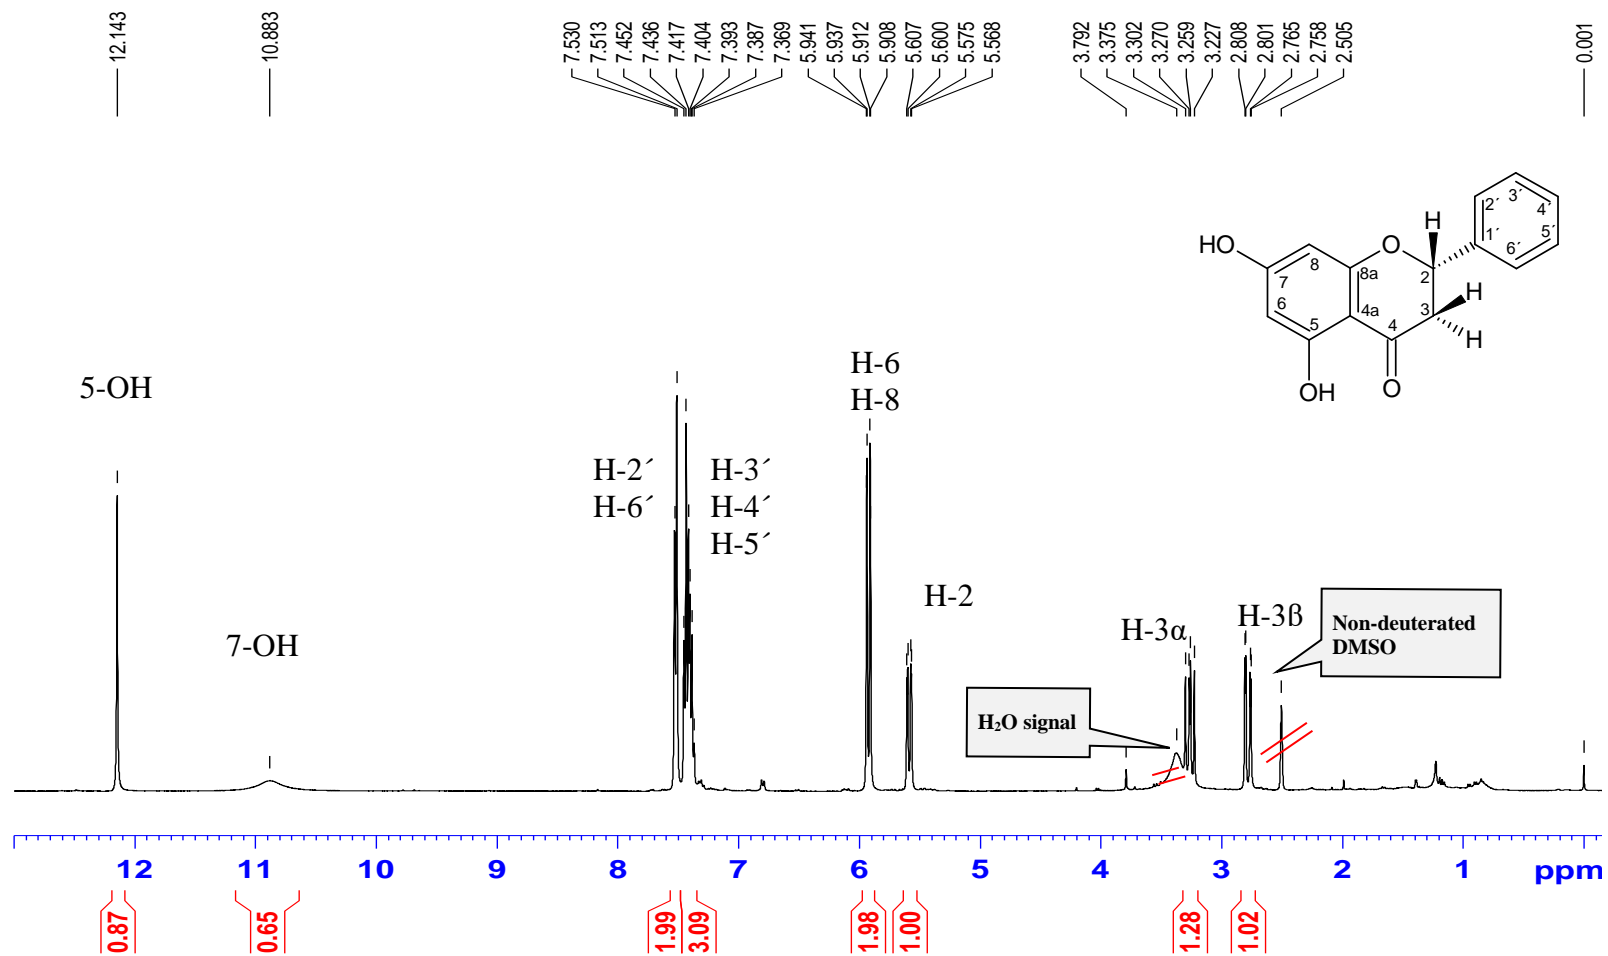

**S2:**  $^1\text{H-NMR}$  Spectrum (Ext. 7.5 – 2.5 ppm) of Pinocembrin (**1**)  $d_6$ -DMSO, 400 MHz

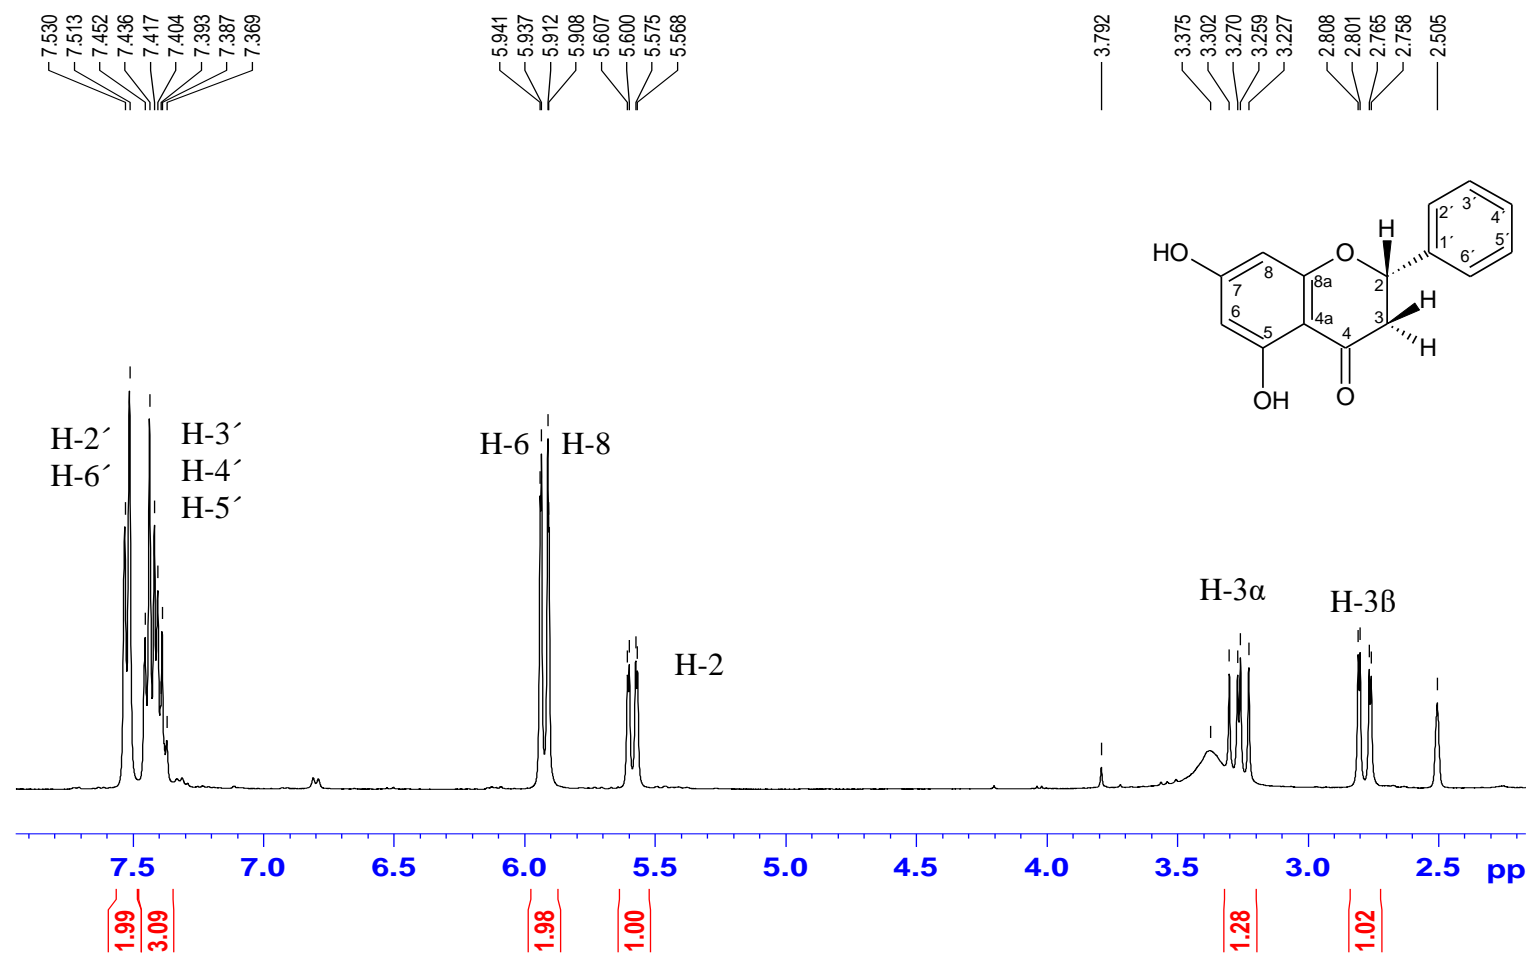

S3: COSY Spectrum of Pinocembrin (1)  $d_6$ -DMSO, 400 MHz

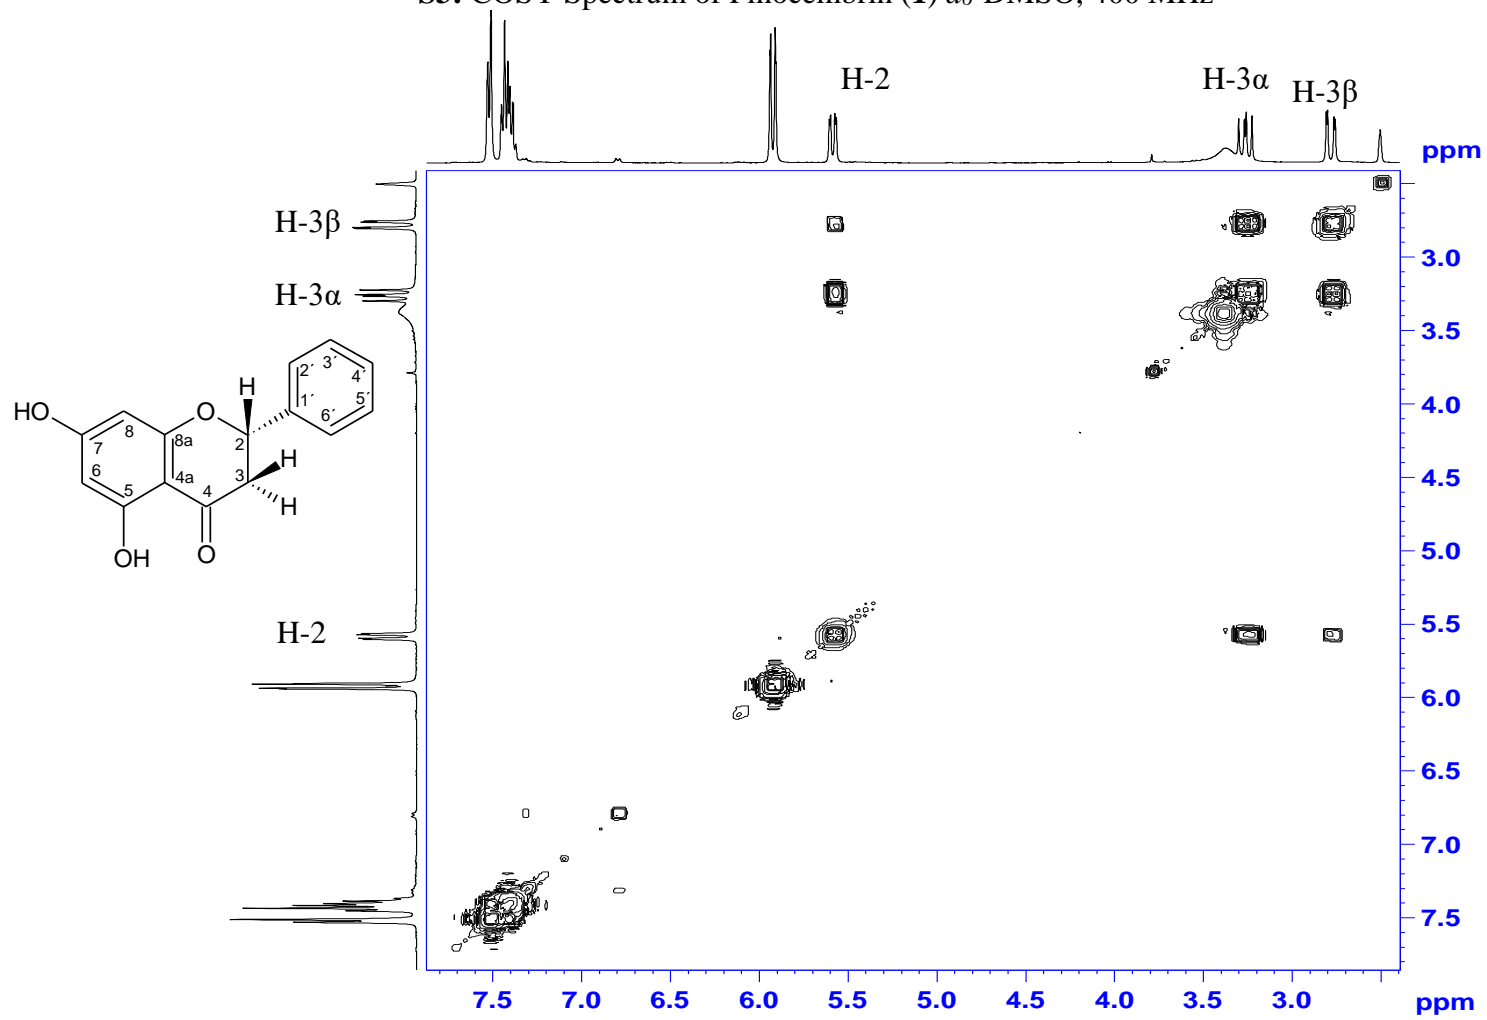

S4:  $^{13}\text{C}$ -NMR Spectrum of Pinocembrin (**1**) ( $d_6$ -DMSO, 100 MHz)

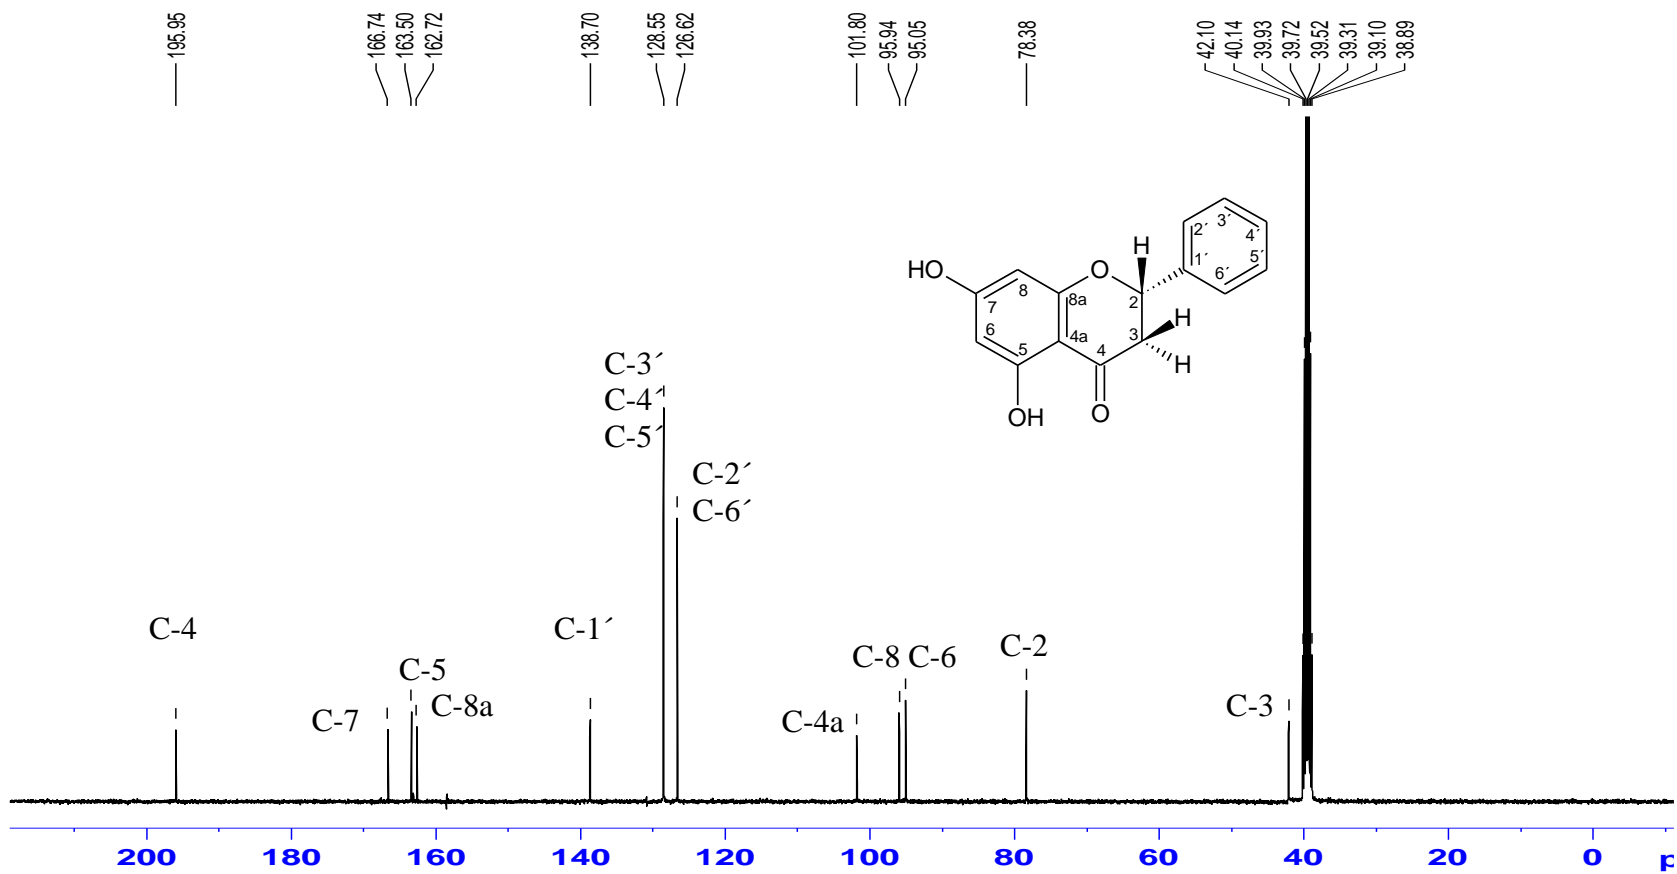

S5: DEPT-135 Spectrum of Pinocembrin (1) (*d*<sub>6</sub>-DMSO, 100 MHz)

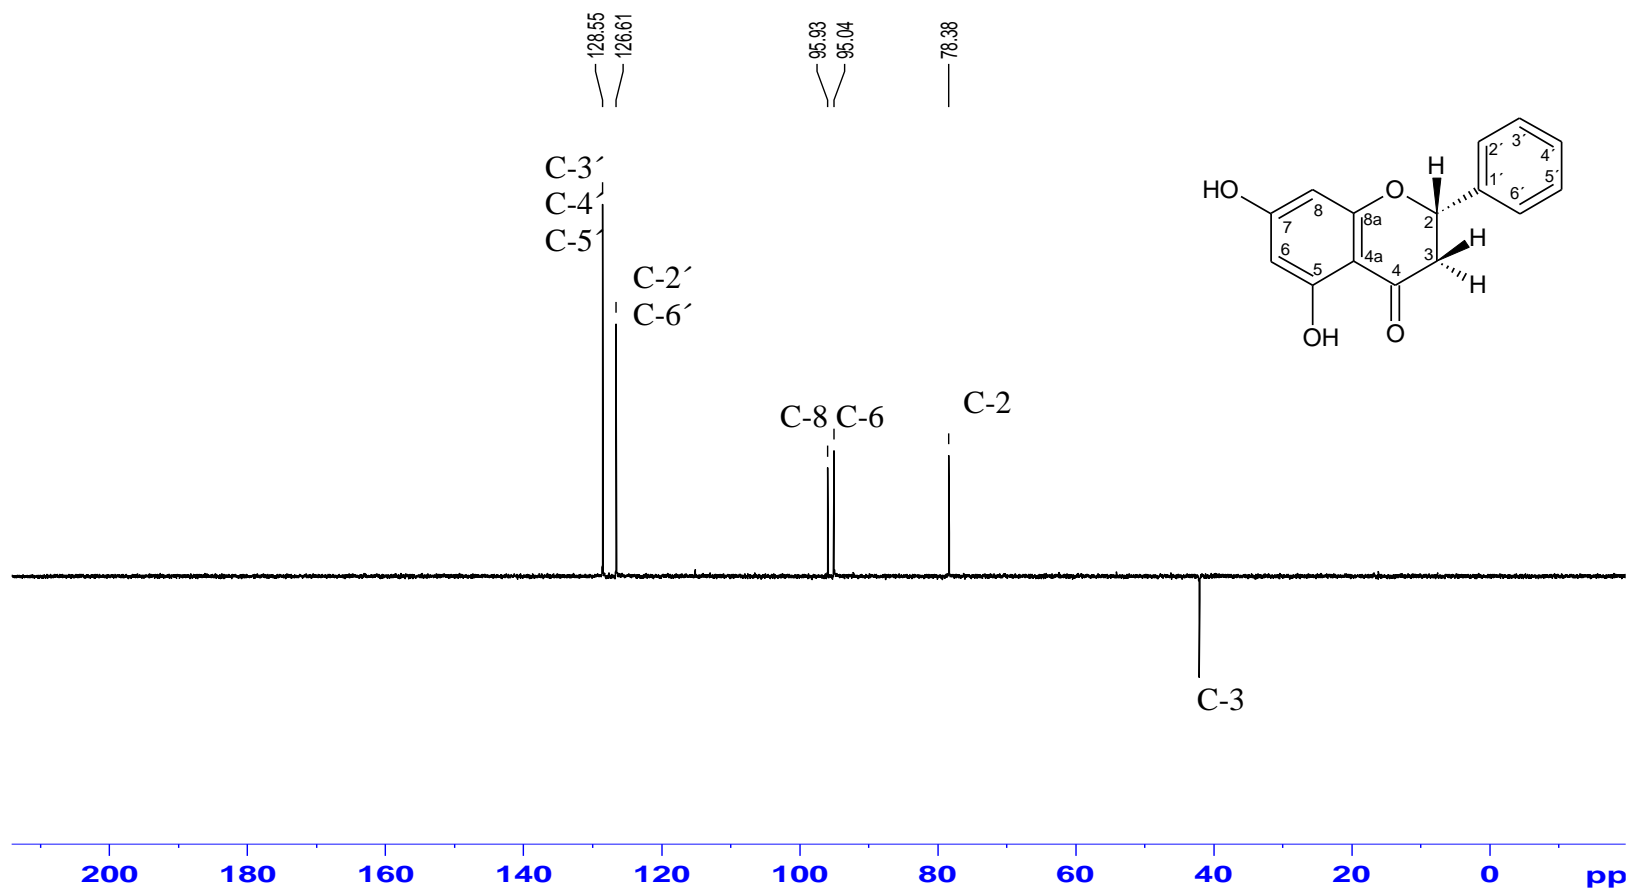

**S6:** HSQC Spectrum (Ext.  $^1\text{H}$ : 2.0-8.2 ppm;  $^{13}\text{C}$ : 40-170 ppm) of Pinocembrin (**1**) ( $d_6$ -DMSO, 400 MHz, 100 MHz)

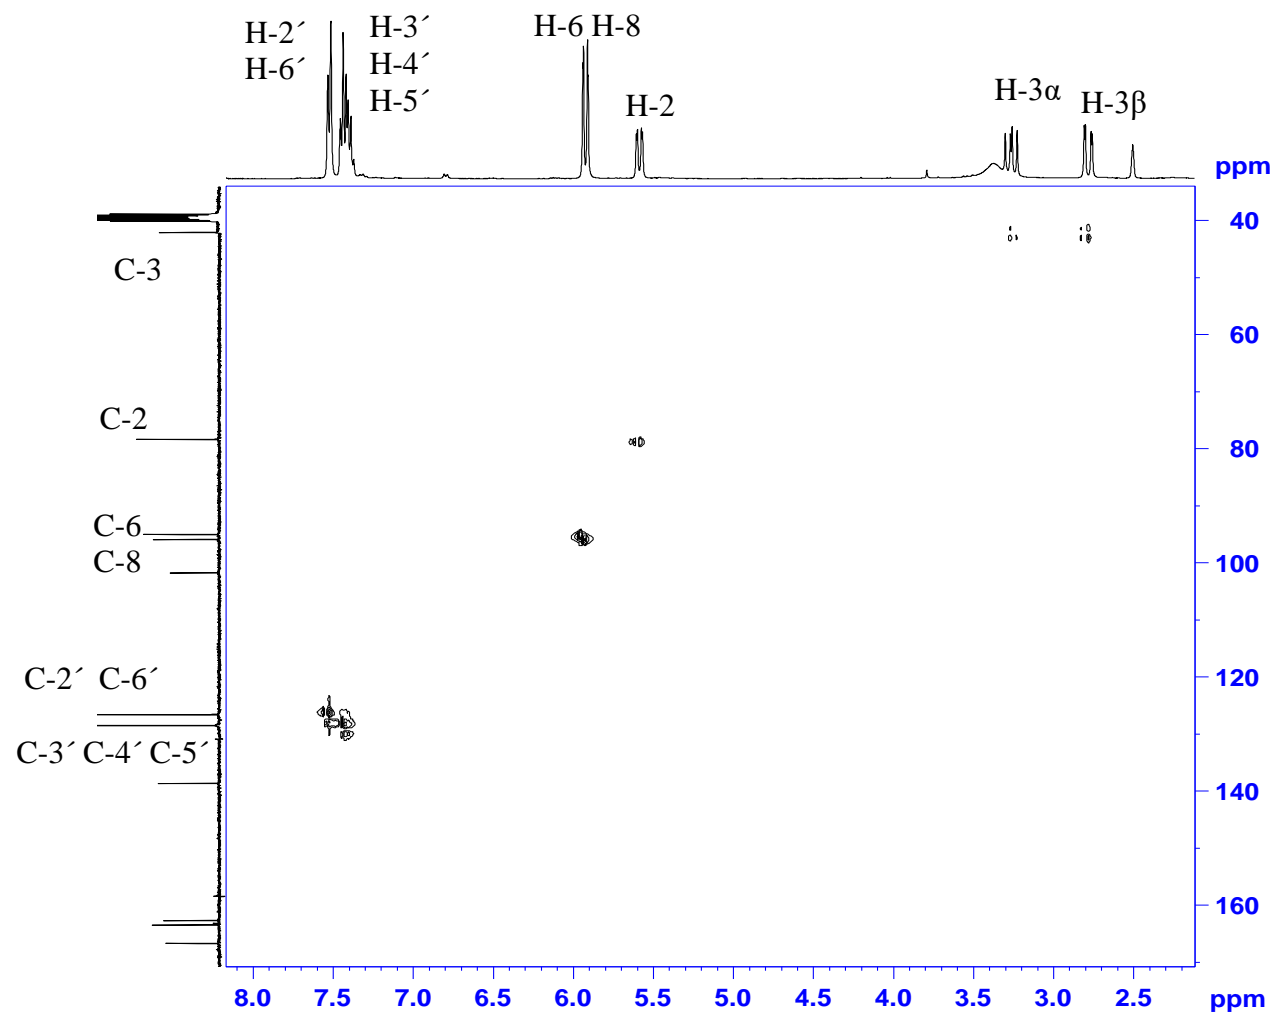



S7: <sup>1</sup>H-NMR Spectrum of Sakuranetin (2) *d*<sub>6</sub>-DMSO, 400 MHz

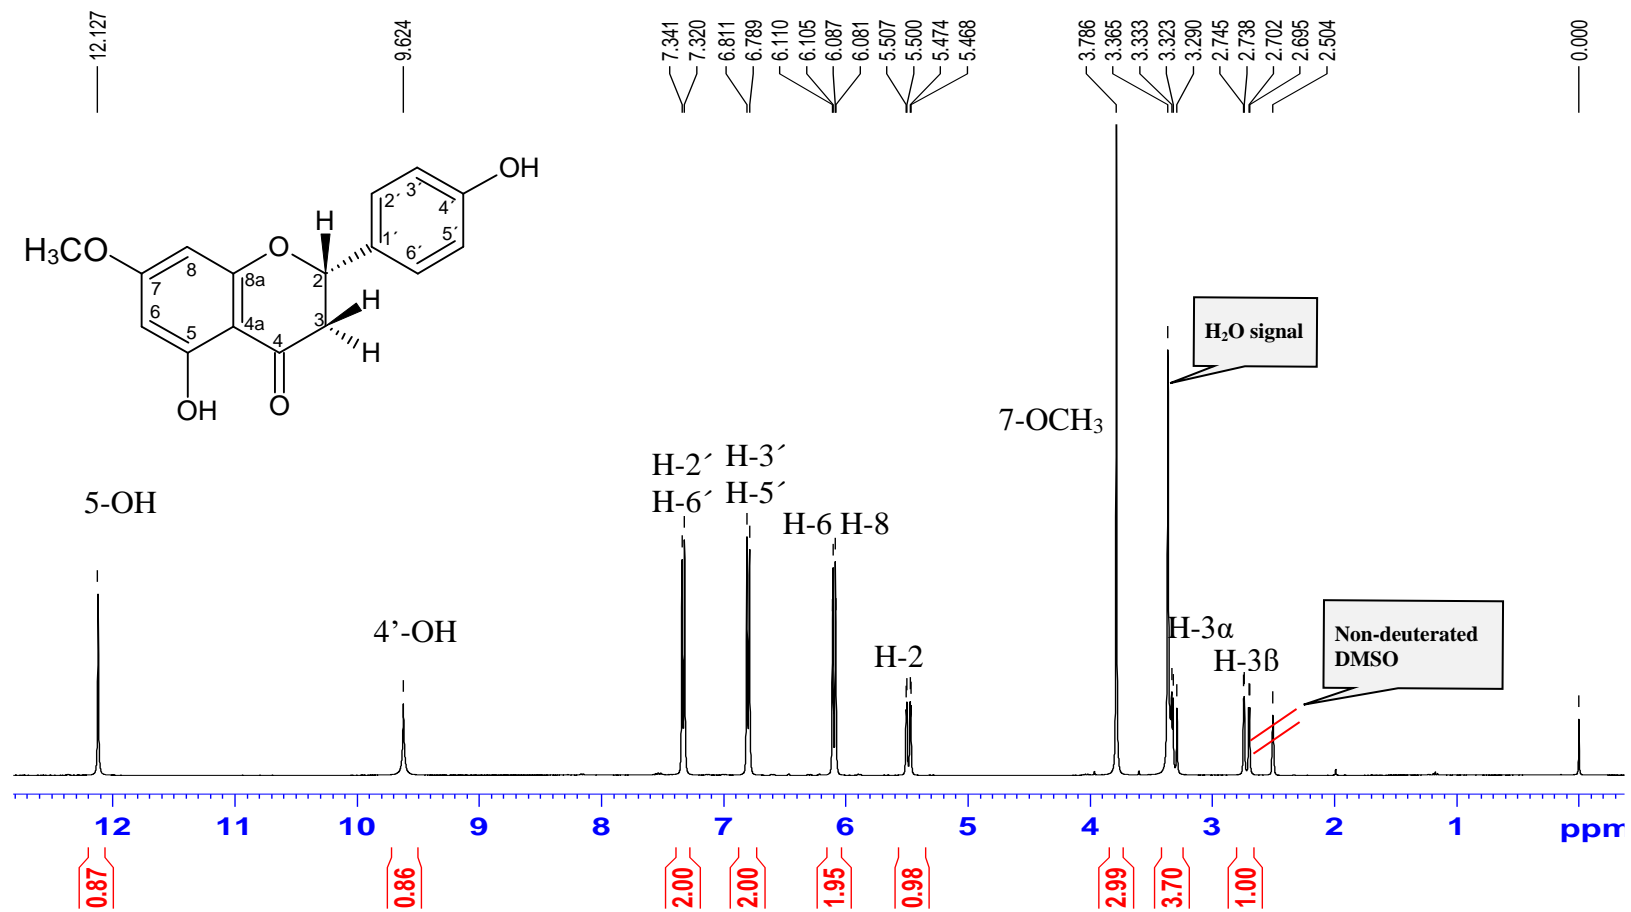

S8:  $^1\text{H-NMR}$  Spectrum (Ext. 6.4 – 8.0 ppm) of Sakuranetin (2)  $d_6$ -DMSO, 400 MHz

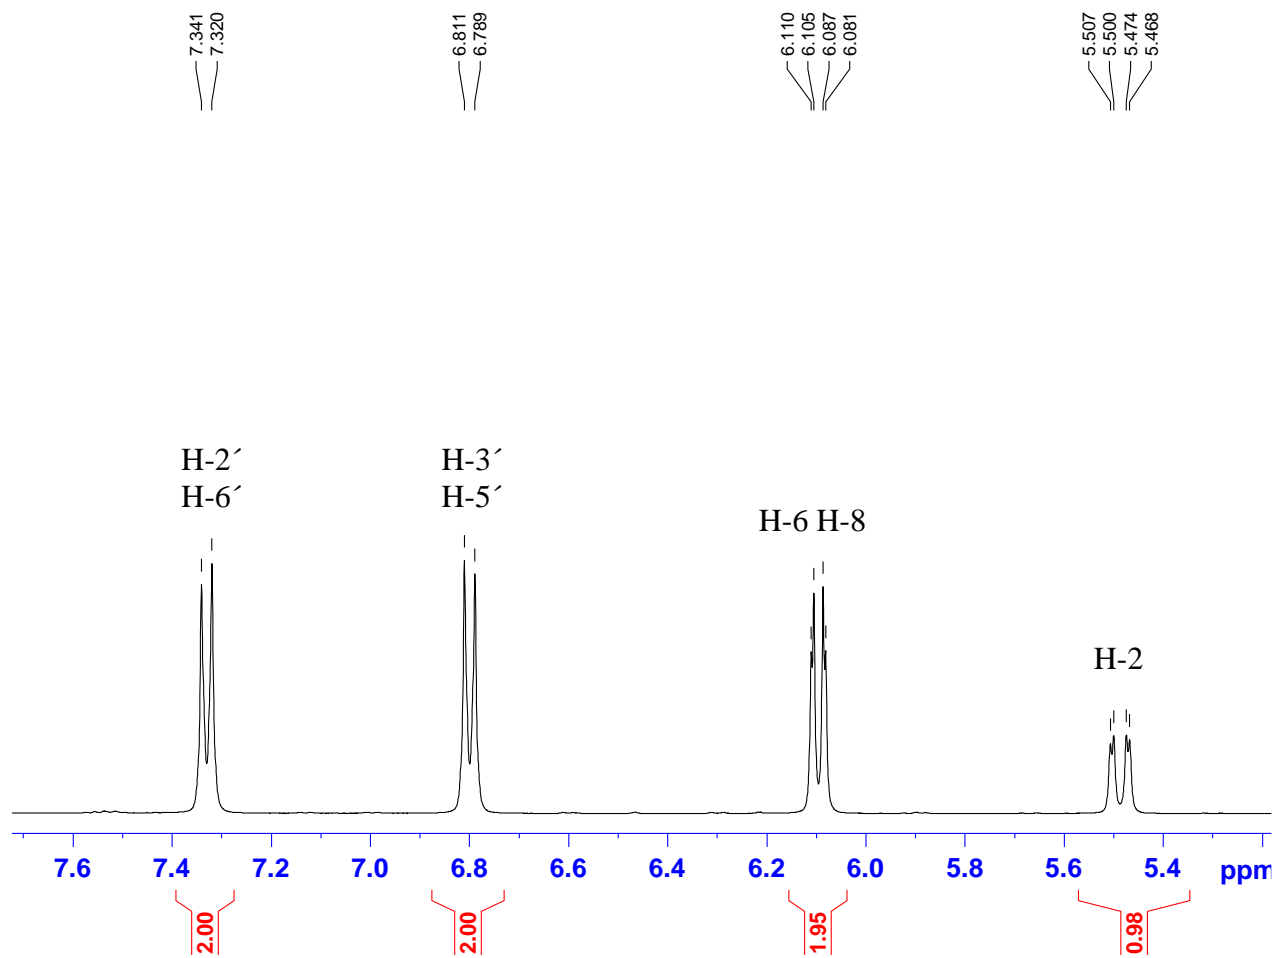

S9:  $^1\text{H-NMR}$  Spectrum (Ext. 2.5 – 4.0 ppm) of Sakuranetin (2)  $d_6$ -DMSO, 400 MHz

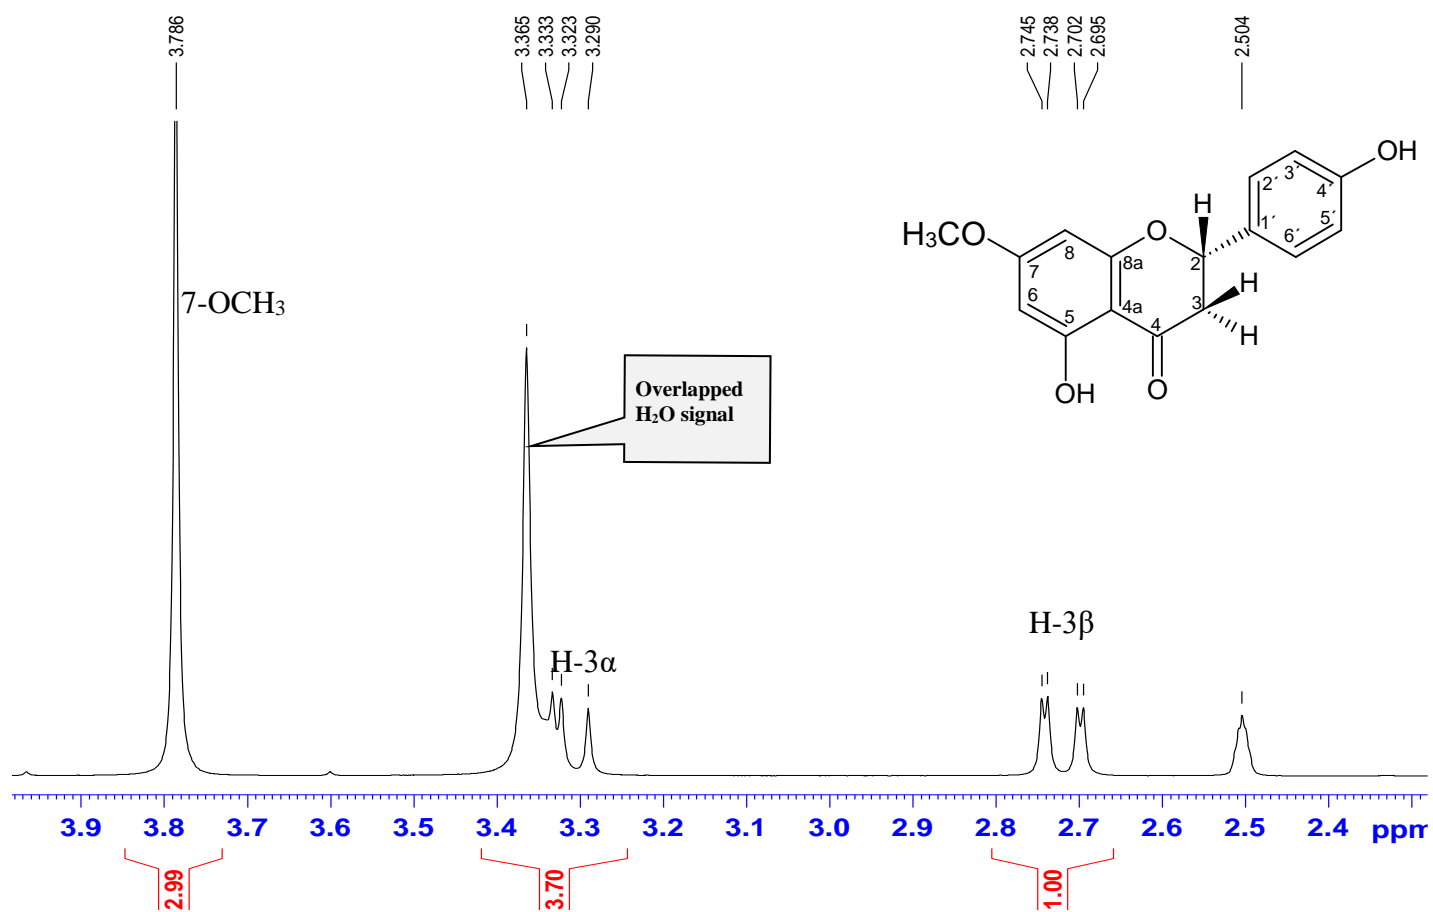

S10: COSY Spectrum of Sakuranetin (2)  $d_6$ -DMSO, 400 MHz

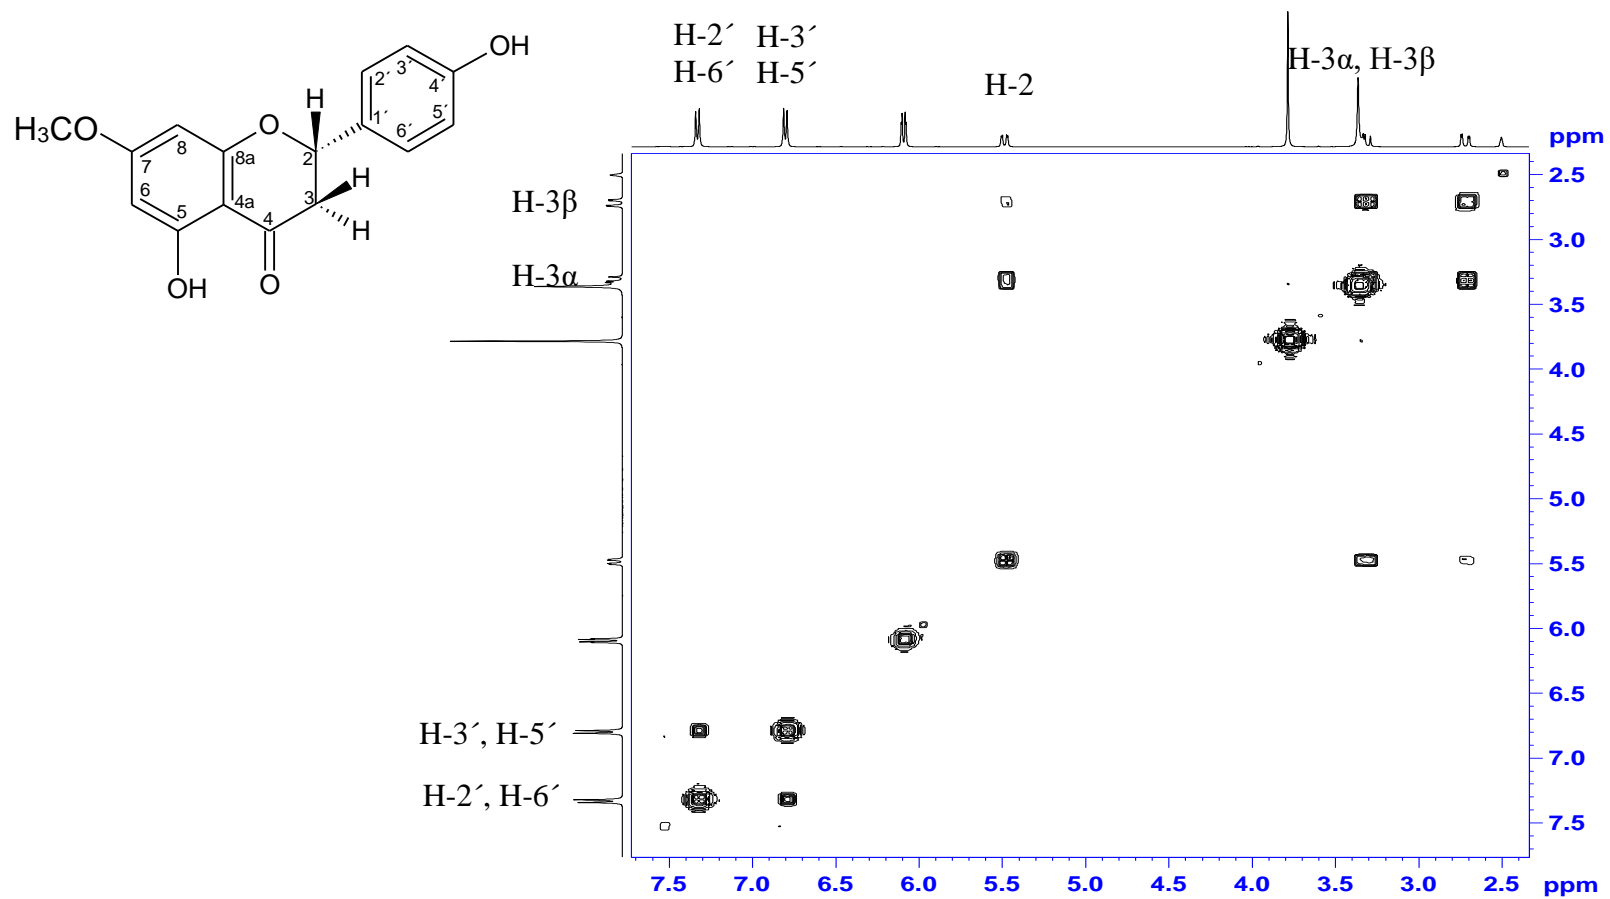

**S11:**  $^{13}\text{C}$ -NMR Spectrum of Sakuranetin (**2**) ( $d_6$ -DMSO, 100 MHz)

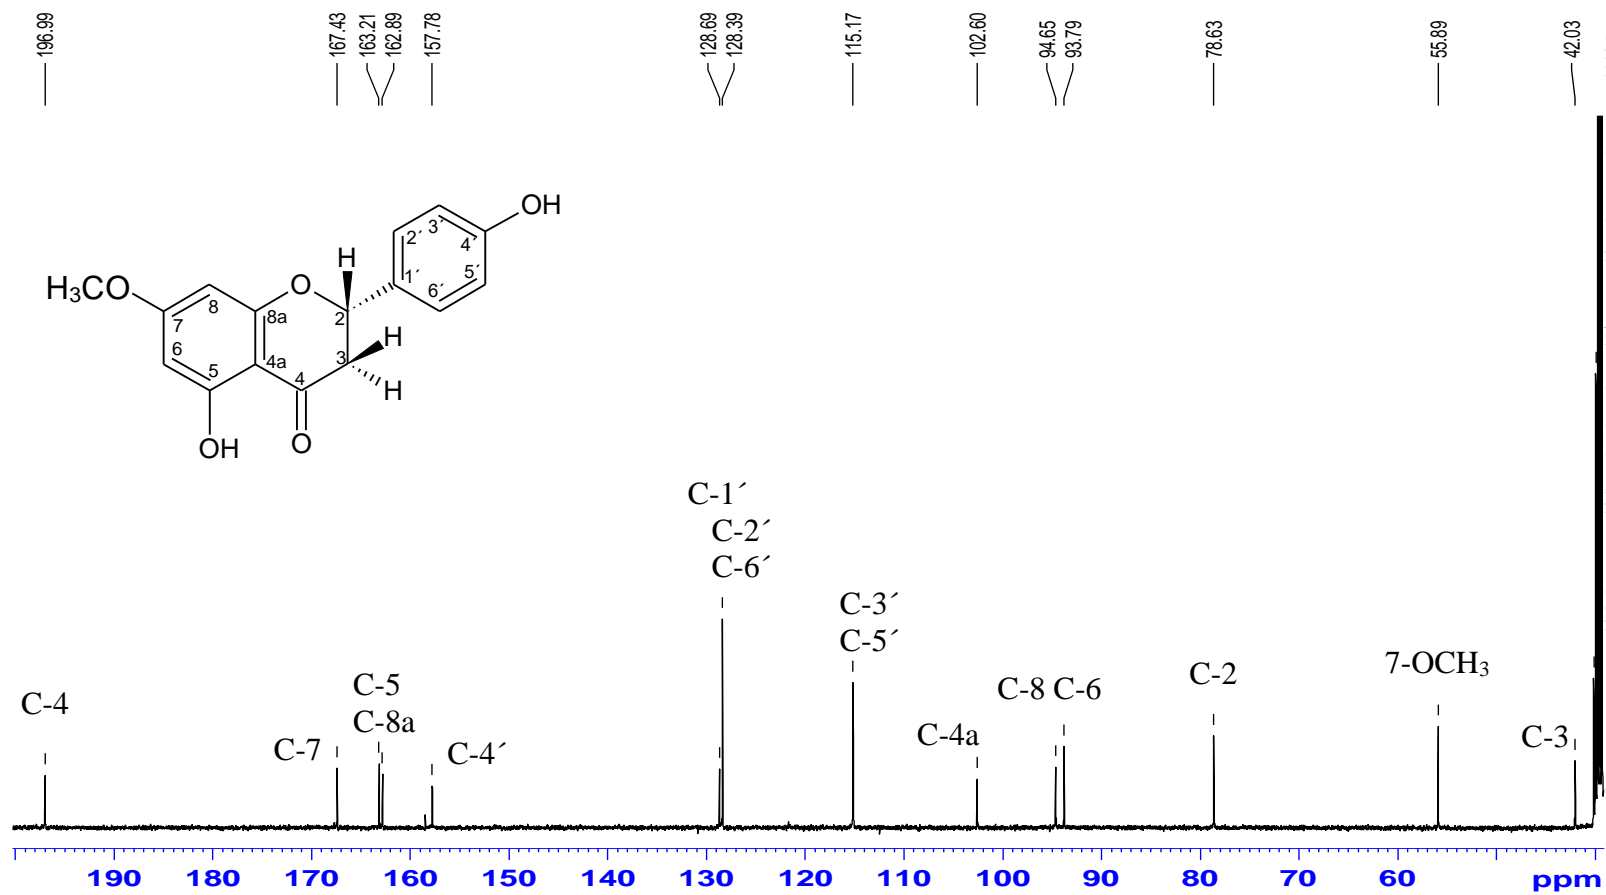

S12: DEPT-135 Spectrum of Sakuranetin (2) (*d*<sub>6</sub>-DMSO, 100 MHz)

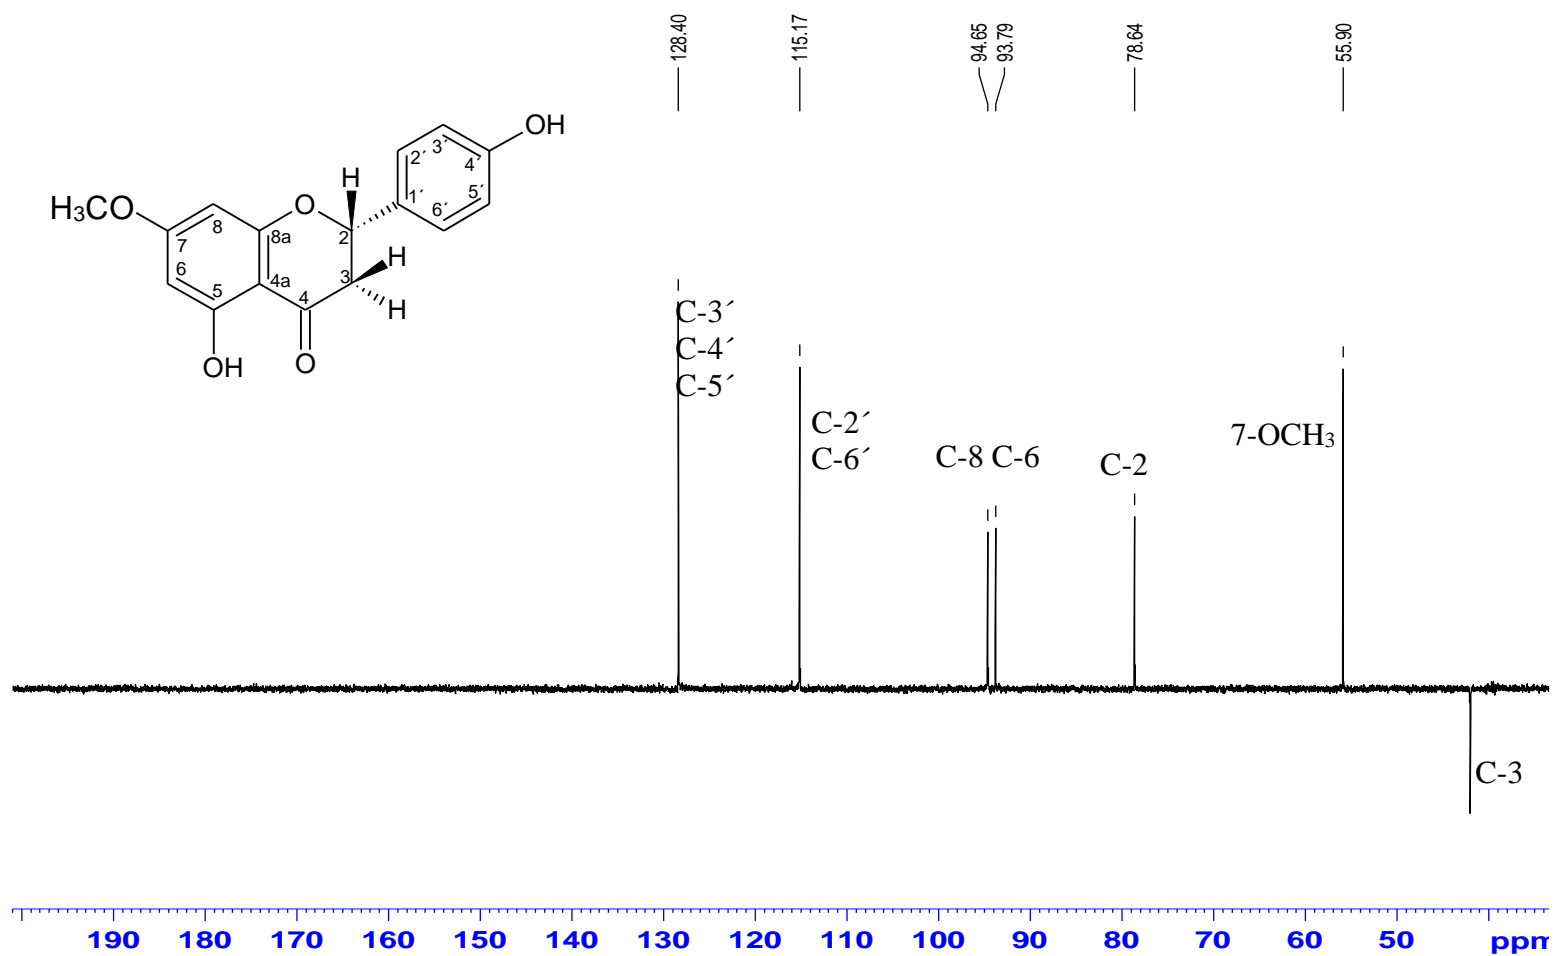

**S13:** HSQC Spectrum (Ext.  $^1\text{H}$ : 2.0-7.6 ppm;  $^{13}\text{C}$ : 40-140 ppm) of Sakuranetin (**2**) ( $d_6$ -DMSO, 400 MHz, 100 MHz)

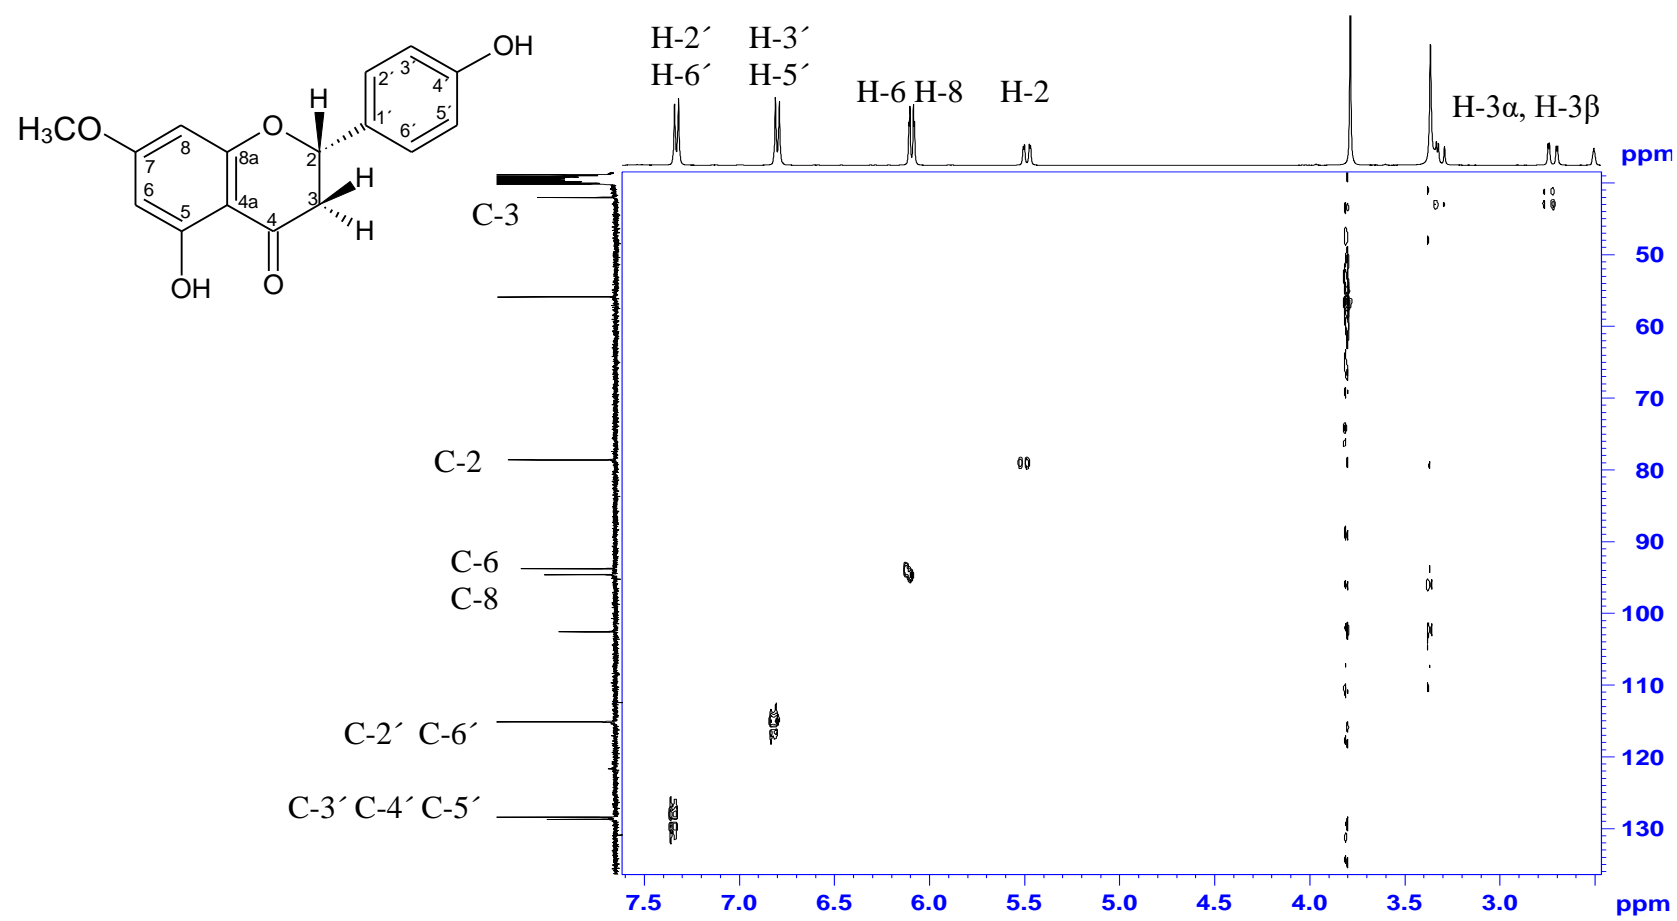

S14: <sup>1</sup>H-NMR Spectrum of Cirsimaritin (3) *d*<sub>6</sub>-DMSO, 400 MHz

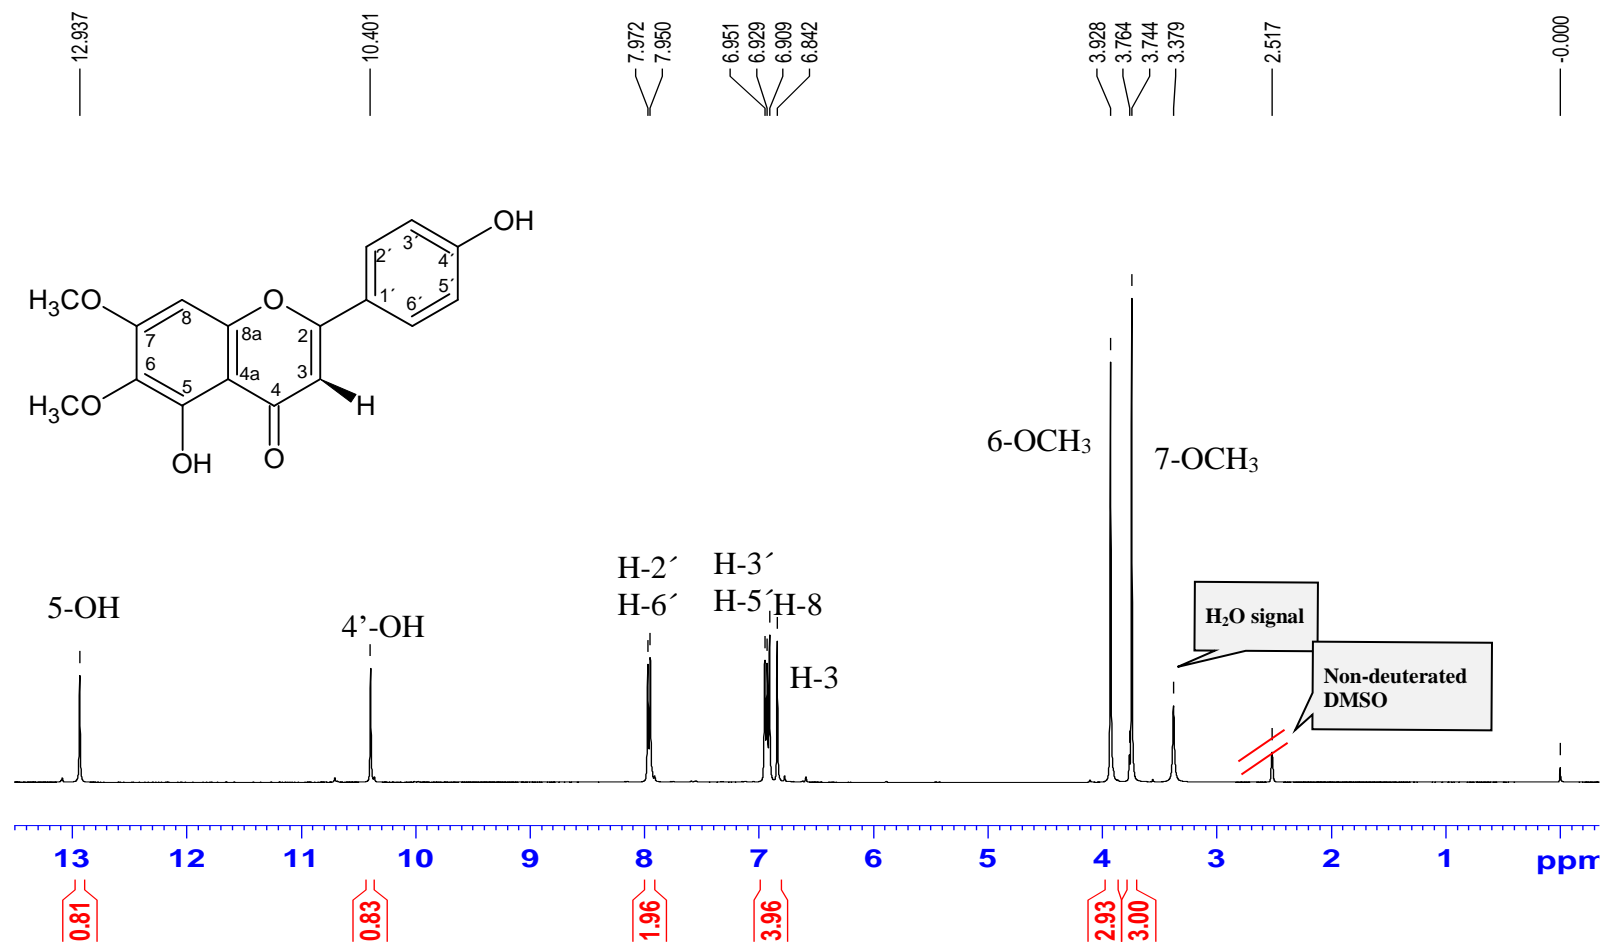



**S15:**  $^1\text{H}$ -NMR Spectrum (Ext. 6.8 – 8.0 ppm) of Cirsimaritin (**3**)  $d_6$ -DMSO, 400 MHz

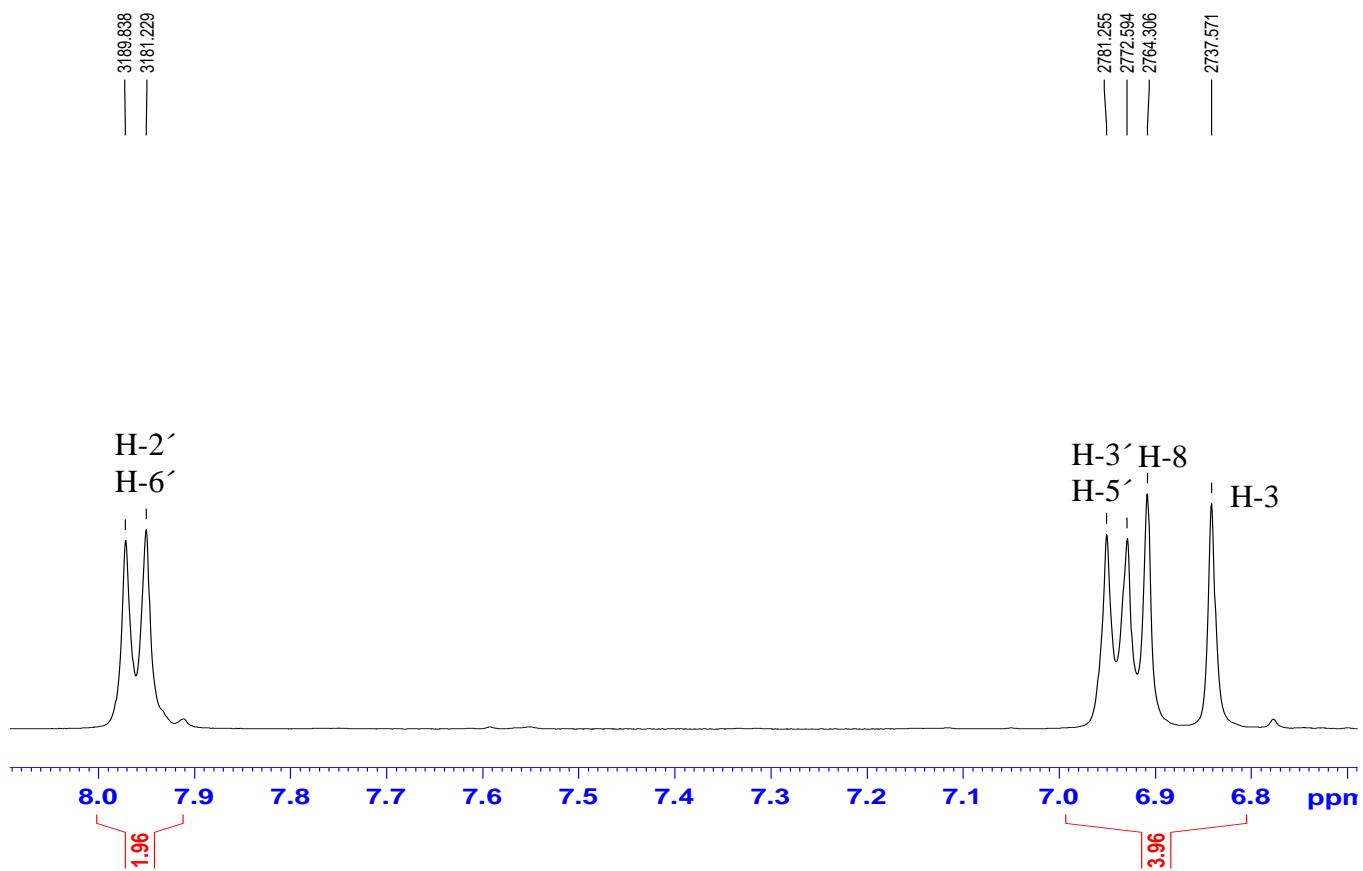

**S16:** COSY Spectrum of Cirsimaritin (**3**)  $d_6$ -DMSO, 400 MHz

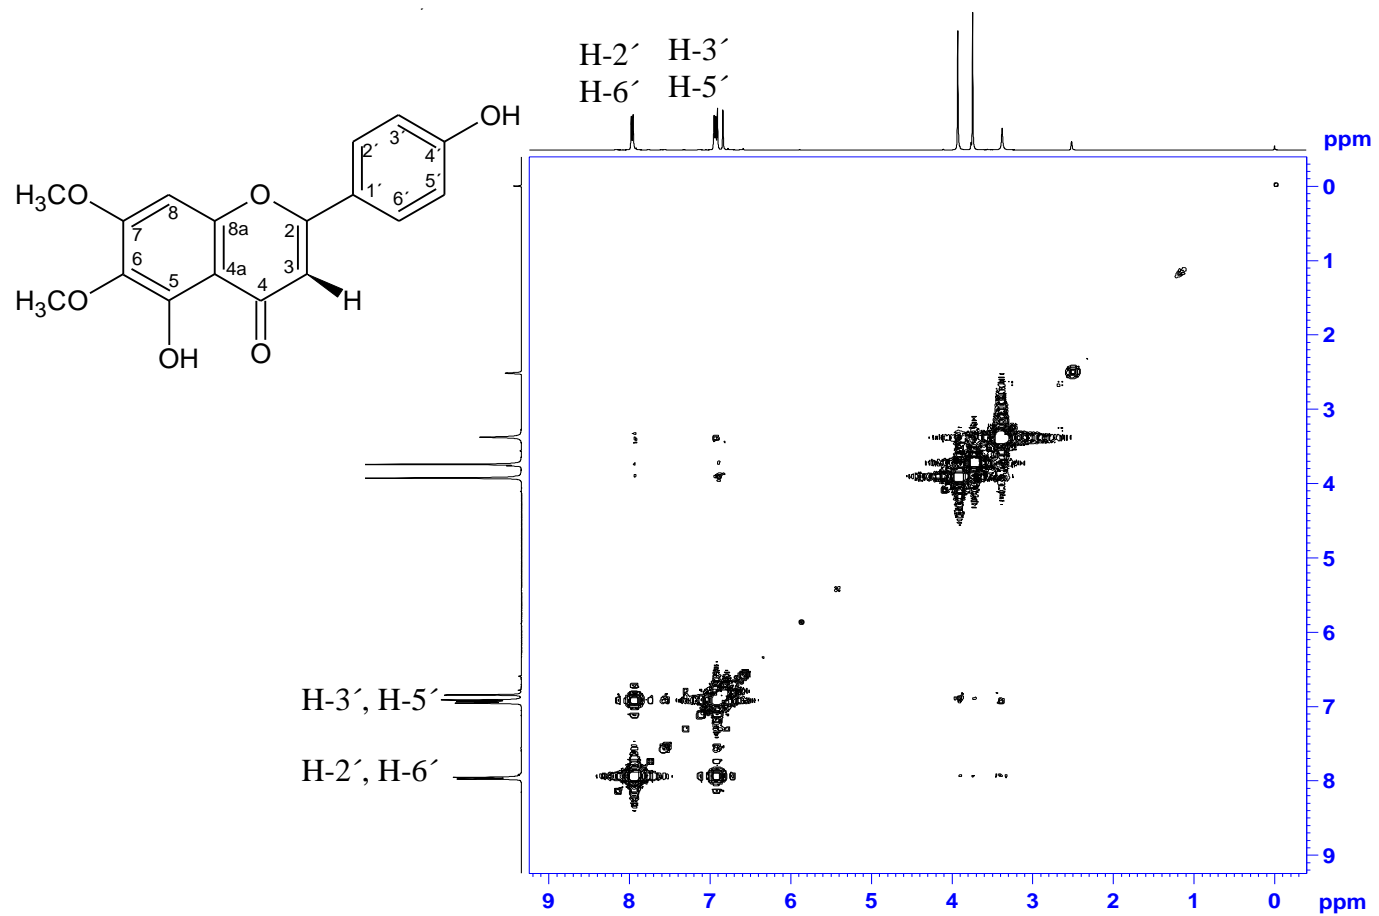

**S17:** COSY Spectrum (Ext  $^1\text{H}$ : 5.0-9.4 ppm;  $^1\text{H}$ : 5.0-9.4 ppm ) of Cirsimaritin (**3**)  $d_6$ -DMSO, 400 MHz

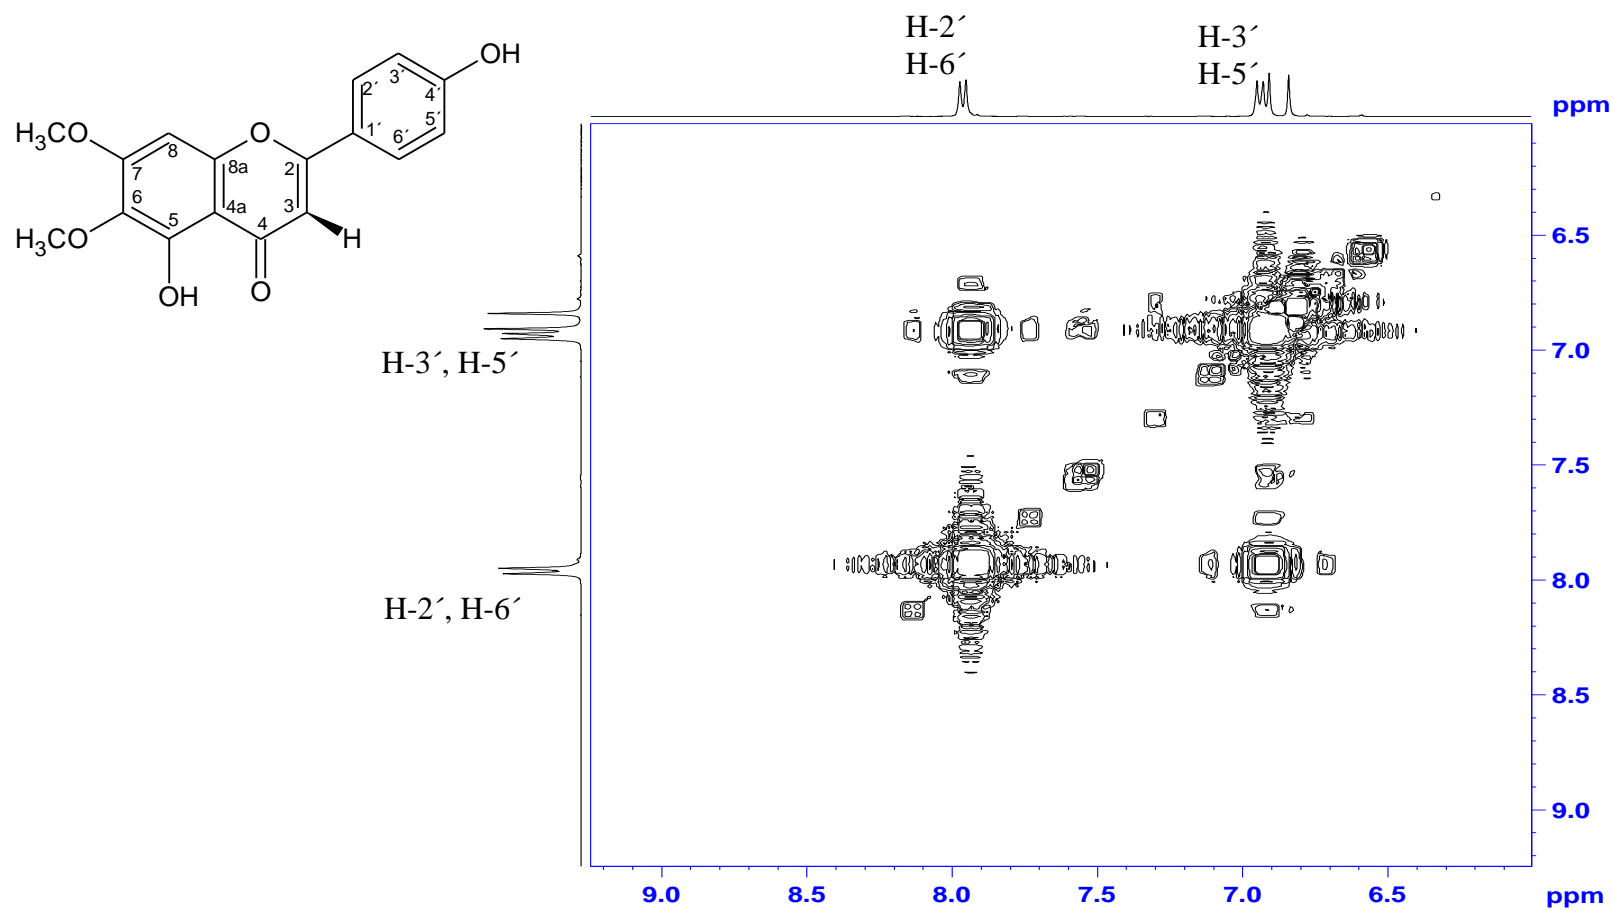

**S18:**  $^{13}\text{C}$ -NMR Spectrum of Cirsimaritin (**3**) ( $d_6$ -DMSO, 100 MHz)

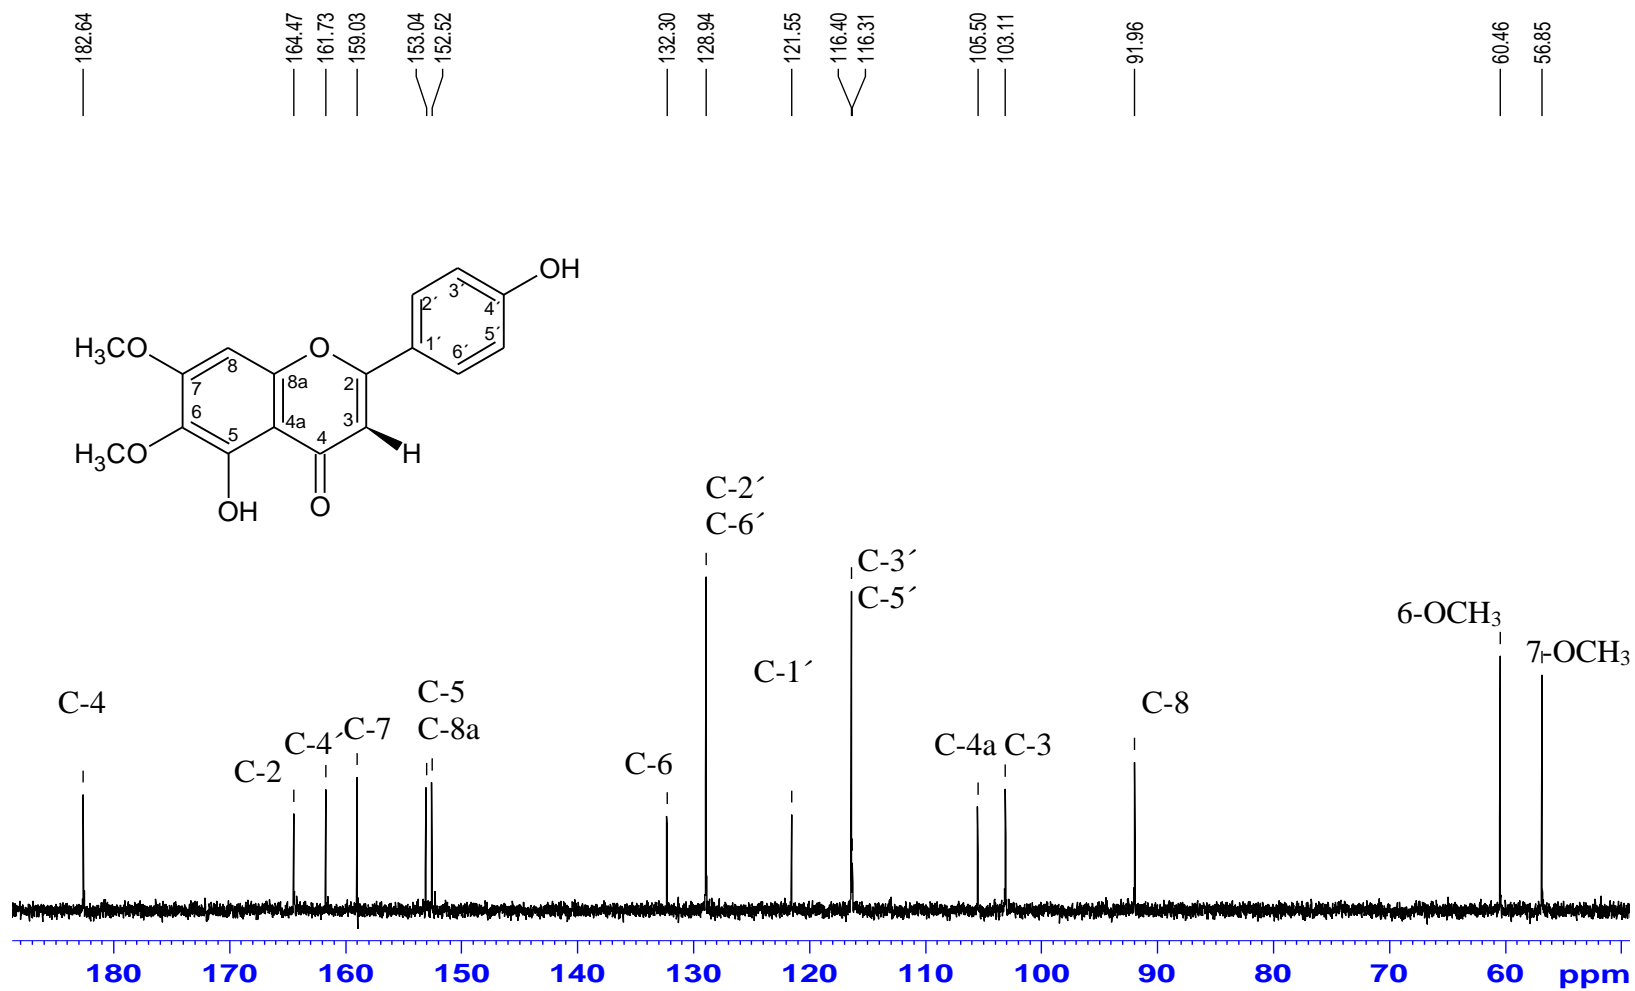

**S19:** HSQC Spectrum (Ext.  $^1\text{H}$ : 6.2-8.4 ppm;  $^{13}\text{C}$ : 85-145 ppm) of Cirsimaritin (**3**) ( $d_6$ -DMSO, 400 MHz, 100 MHz)

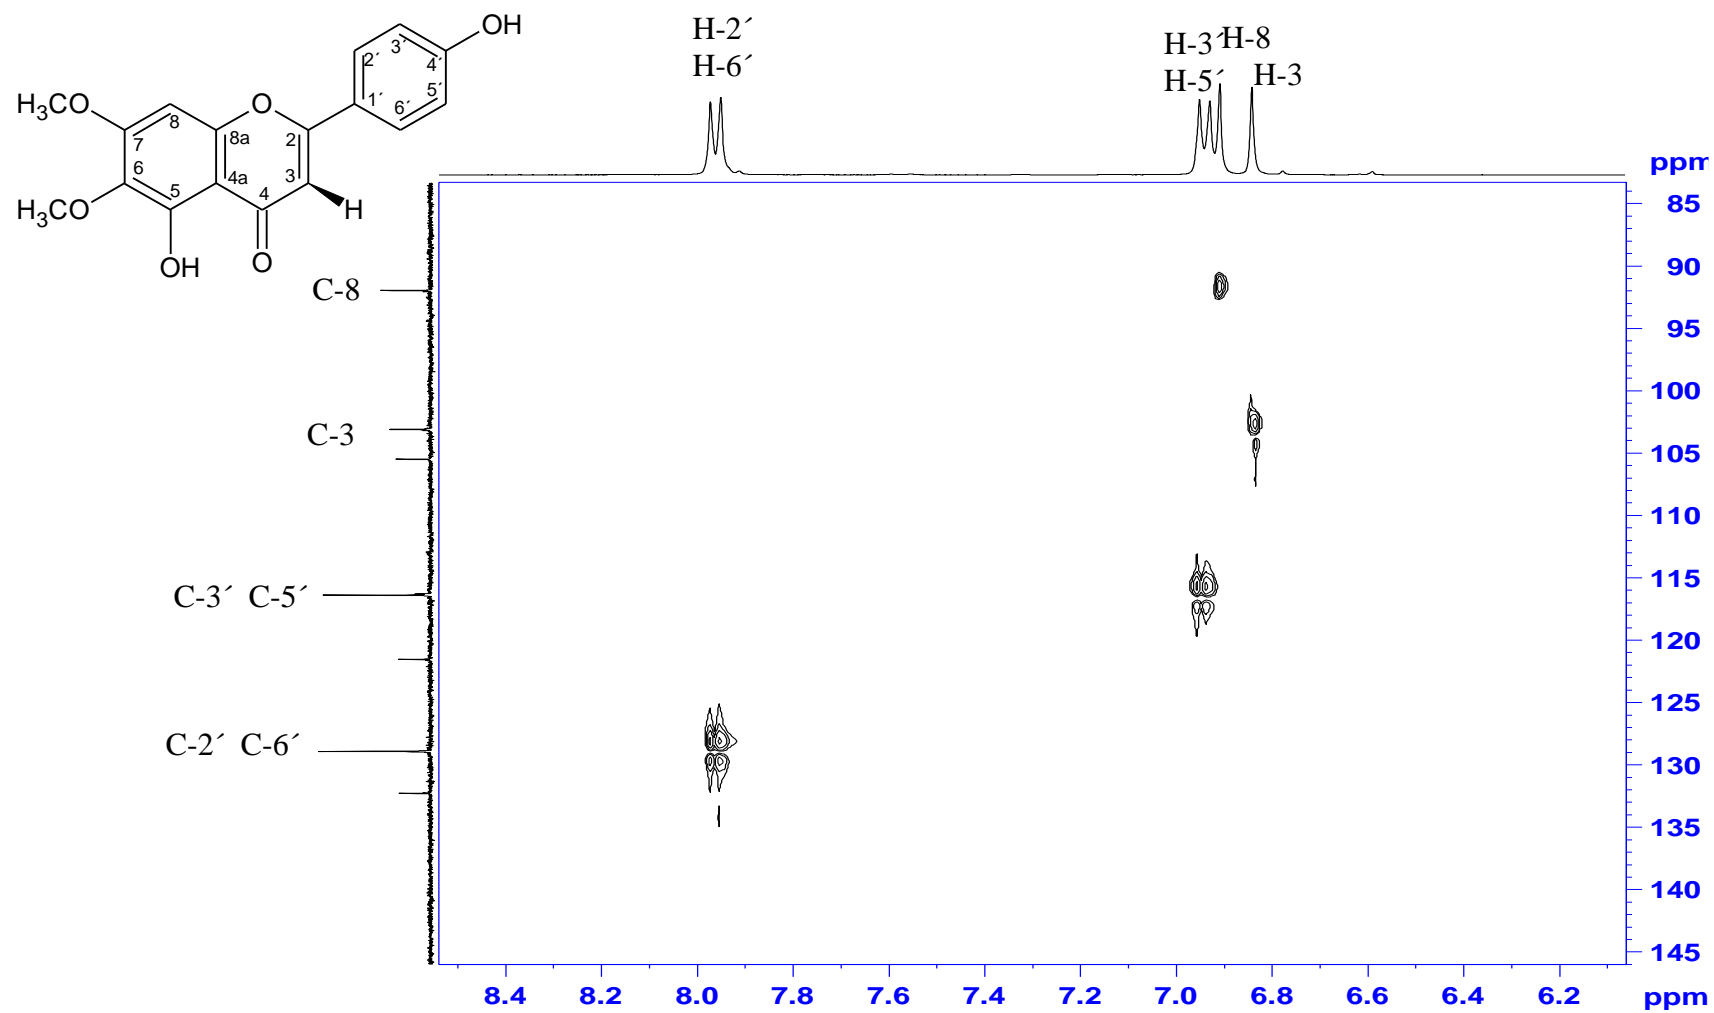

S20: <sup>1</sup>H-NMR Spectrum of Naringenin (4) *d*<sub>6</sub>-DMSO, 400 MHz

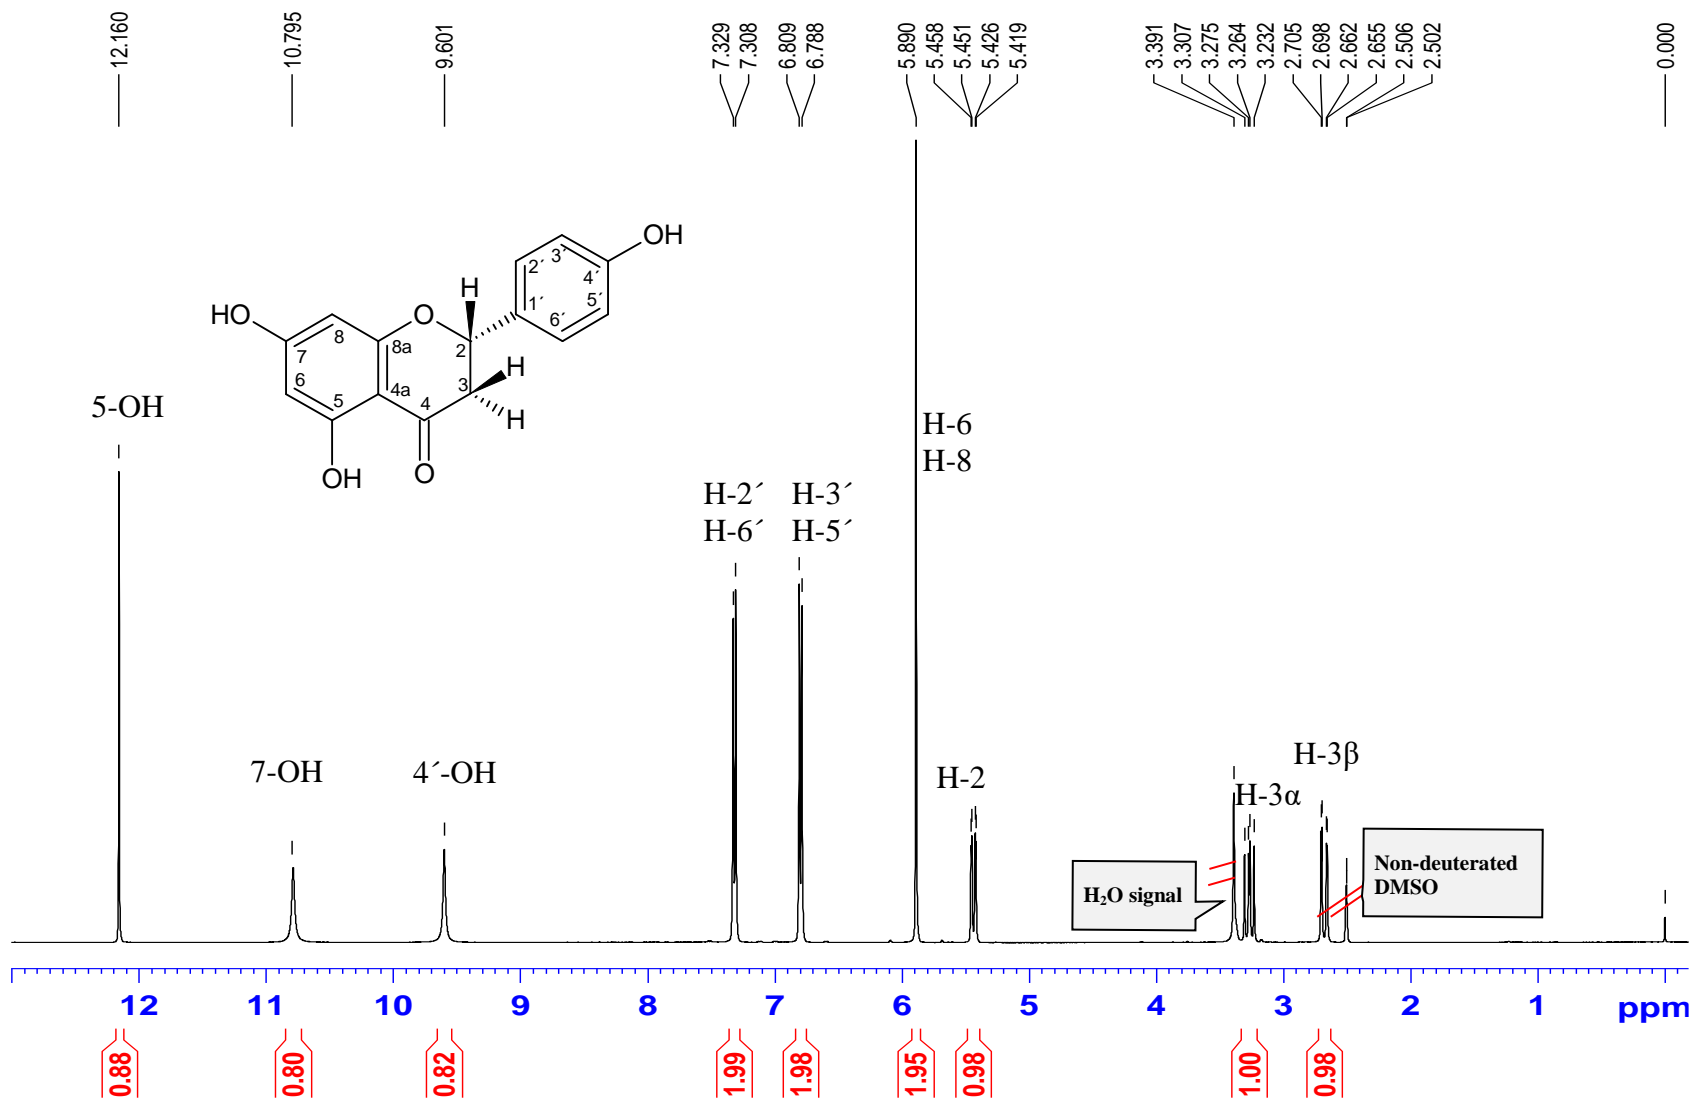

**S21:** <sup>1</sup>H-NMR Spectrum (Ext. 8.0 – 2.0 ppm) of Naringenin (**4**) *d*<sub>6</sub>-DMSO, 400 MHz

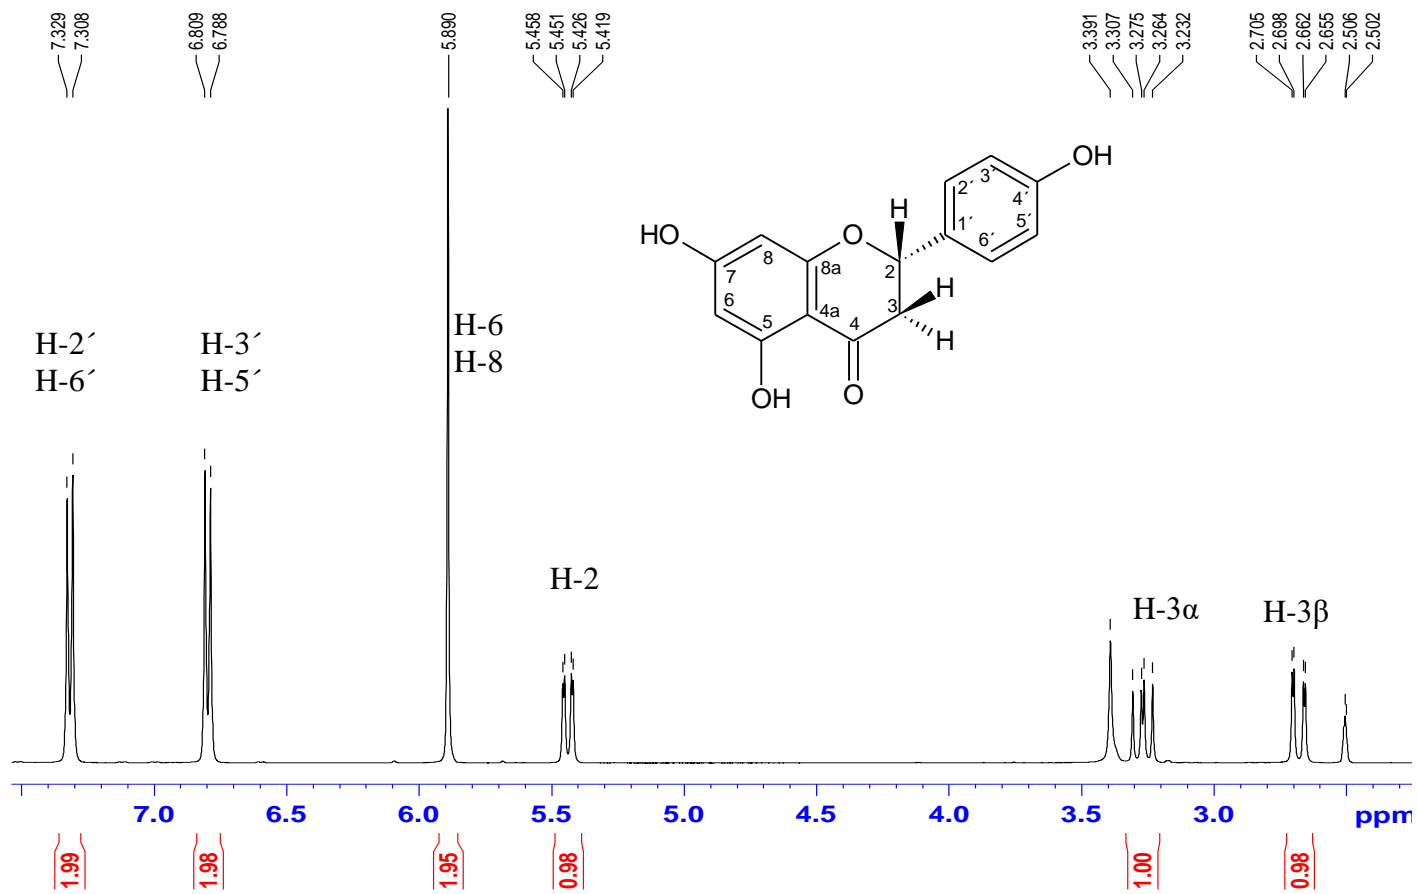

S22: COSY Spectrum of Naringenin (4) *d*<sub>6</sub>-DMSO, 400 MHz

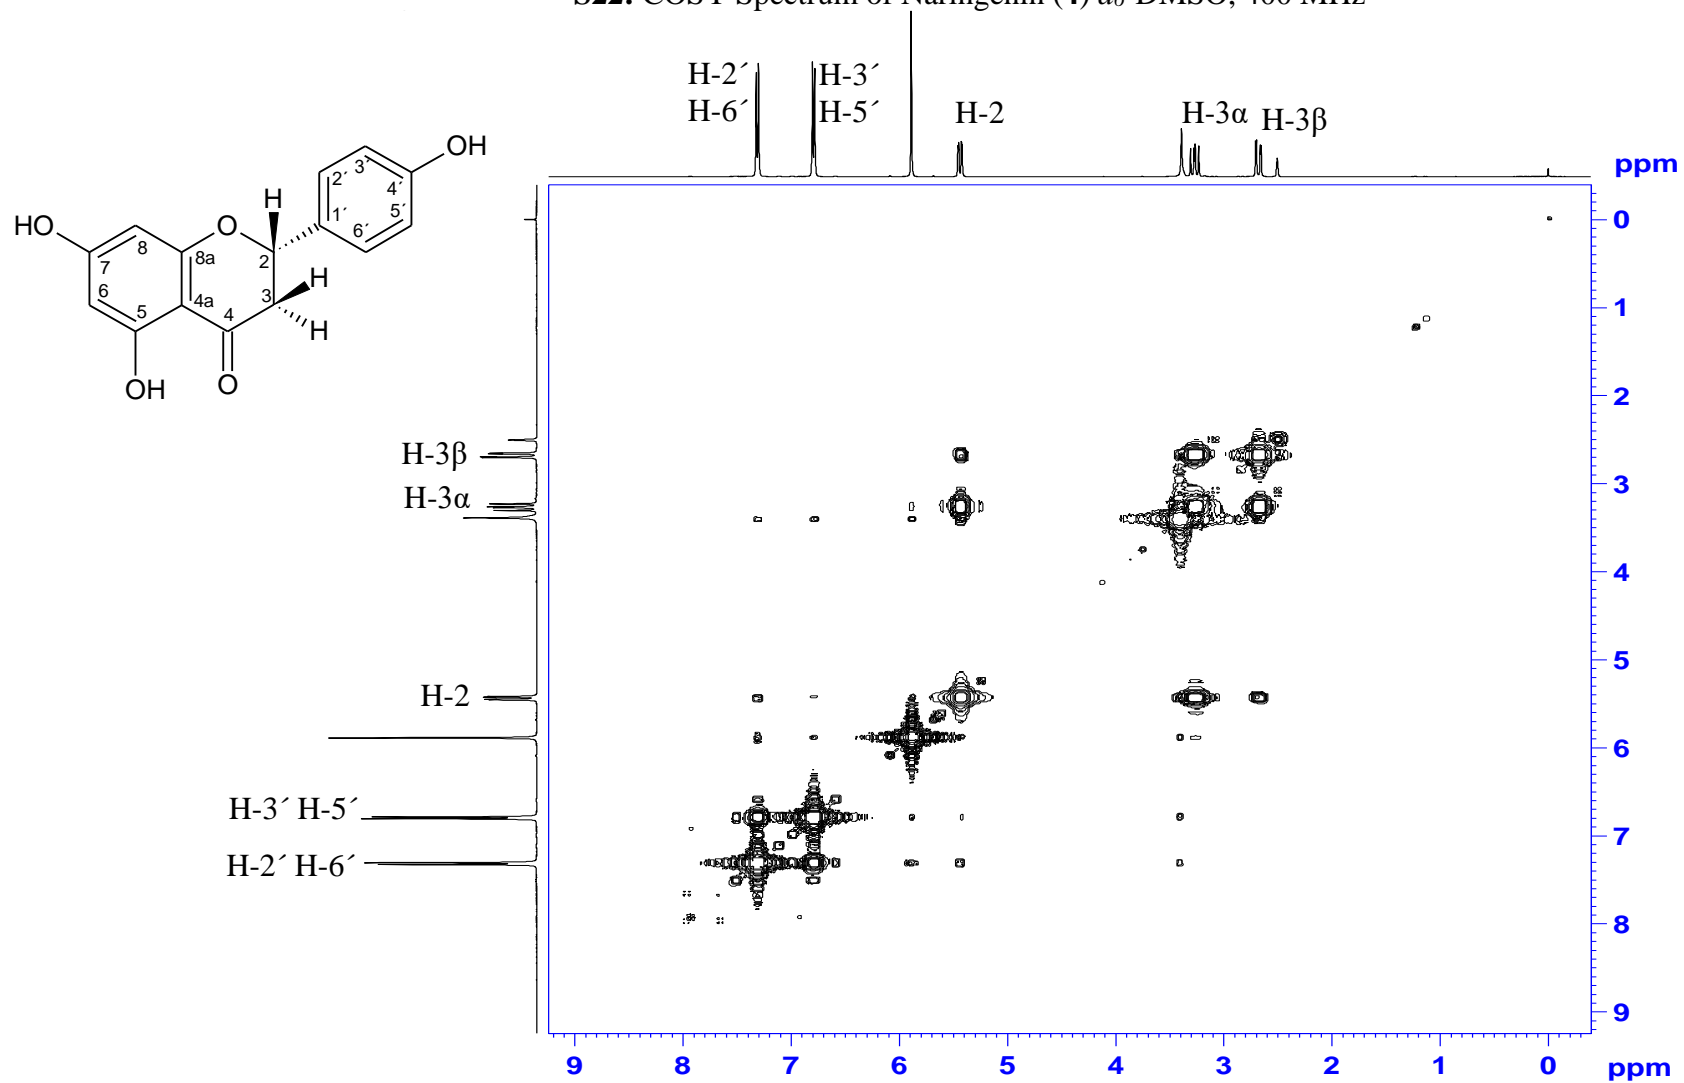



**S23:**  $^{13}\text{C}$ -NMR Spectrum of Naringenin (4) ( $d_6$ -DMSO, 100 MHz)

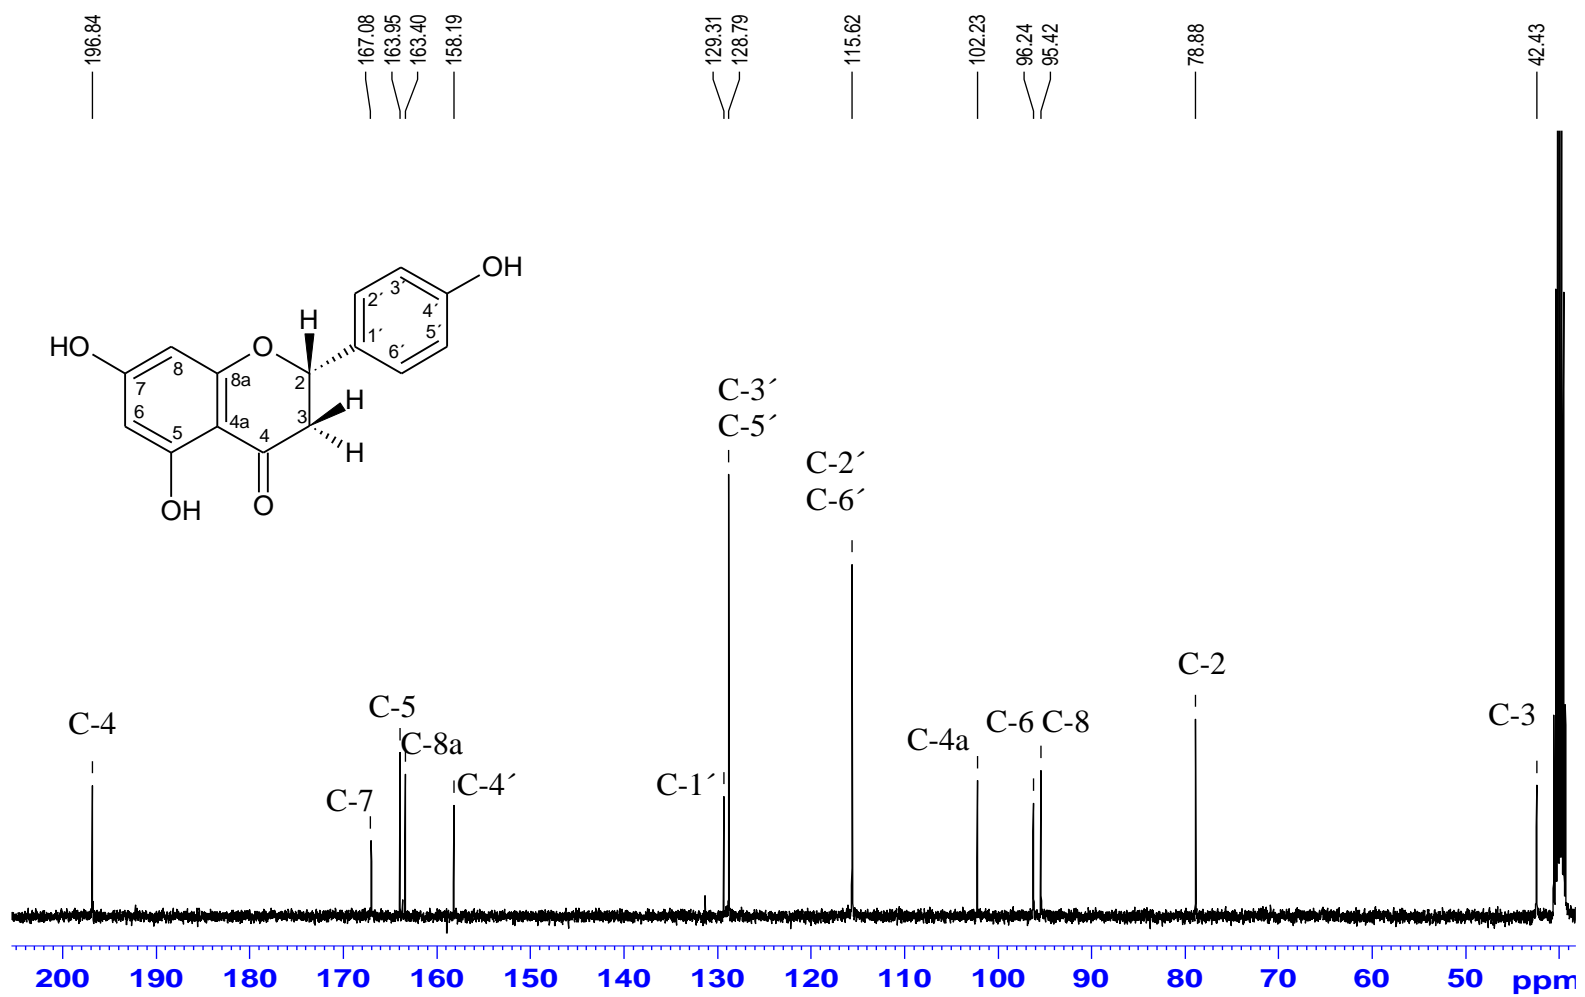

S24: DEPT-135 Spectrum of Naringenin (4) (*d*<sub>6</sub>-DMSO, 100 MHz)

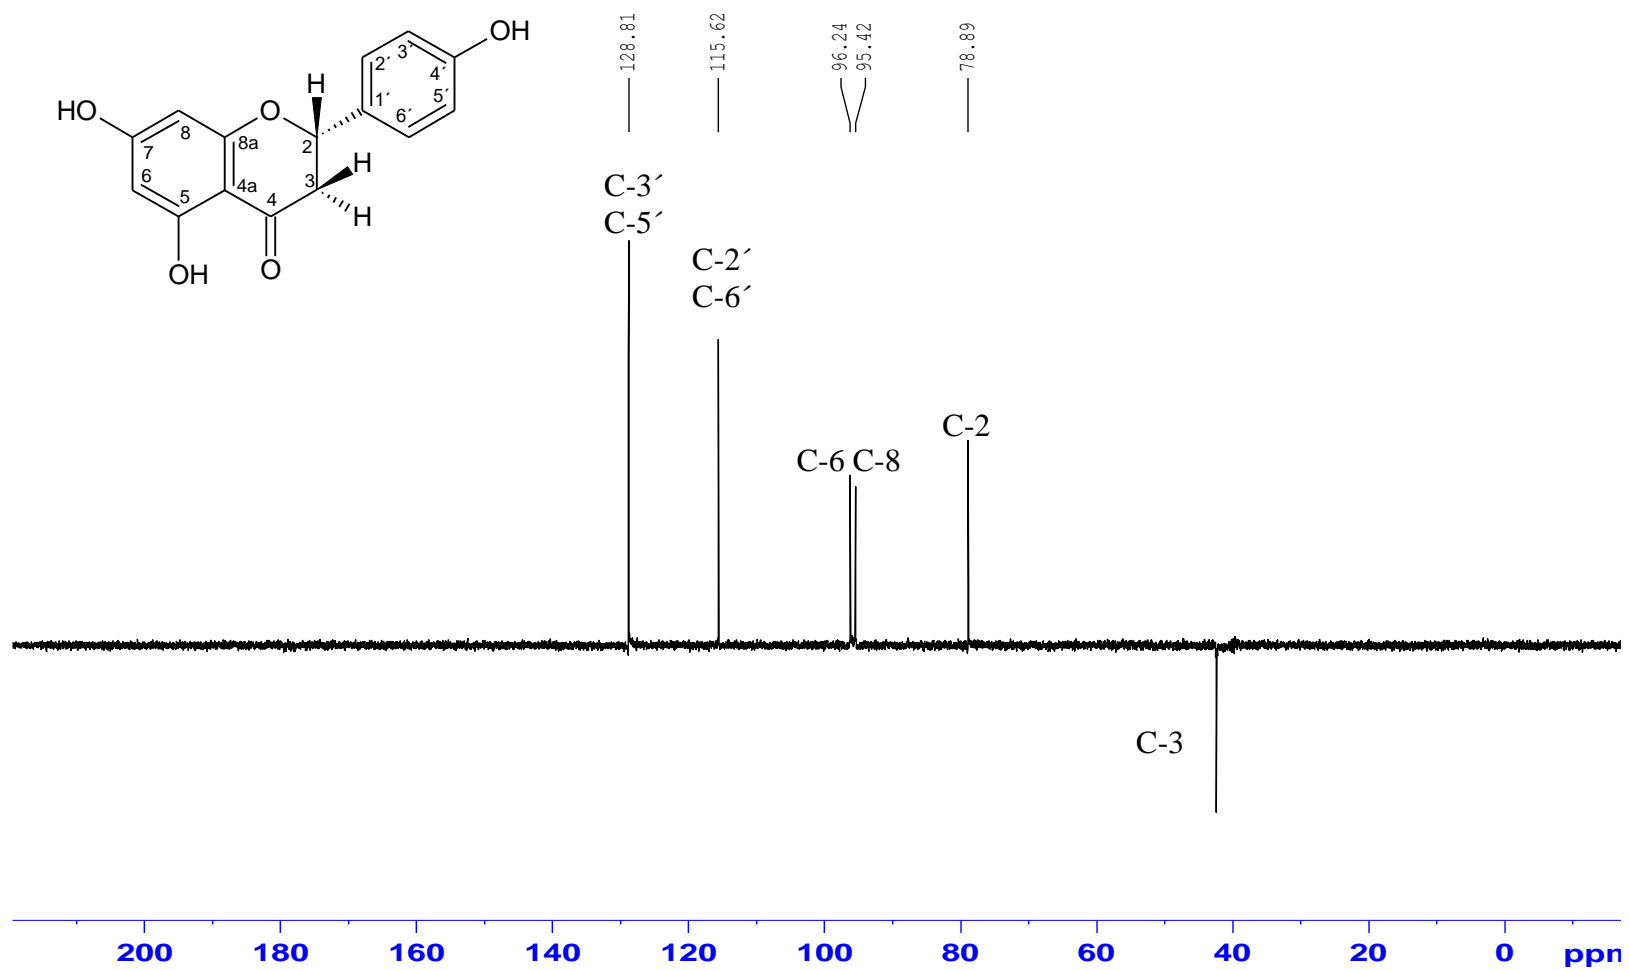

S25: HSQC Spectrum (Ext.  $^1\text{H}$ : 0-9.0 ppm;  $^{13}\text{C}$ : 10-180 ppm) of Naringenin (4) ( $d_6$ -DMSO, 400 MHz, 100 MHz)

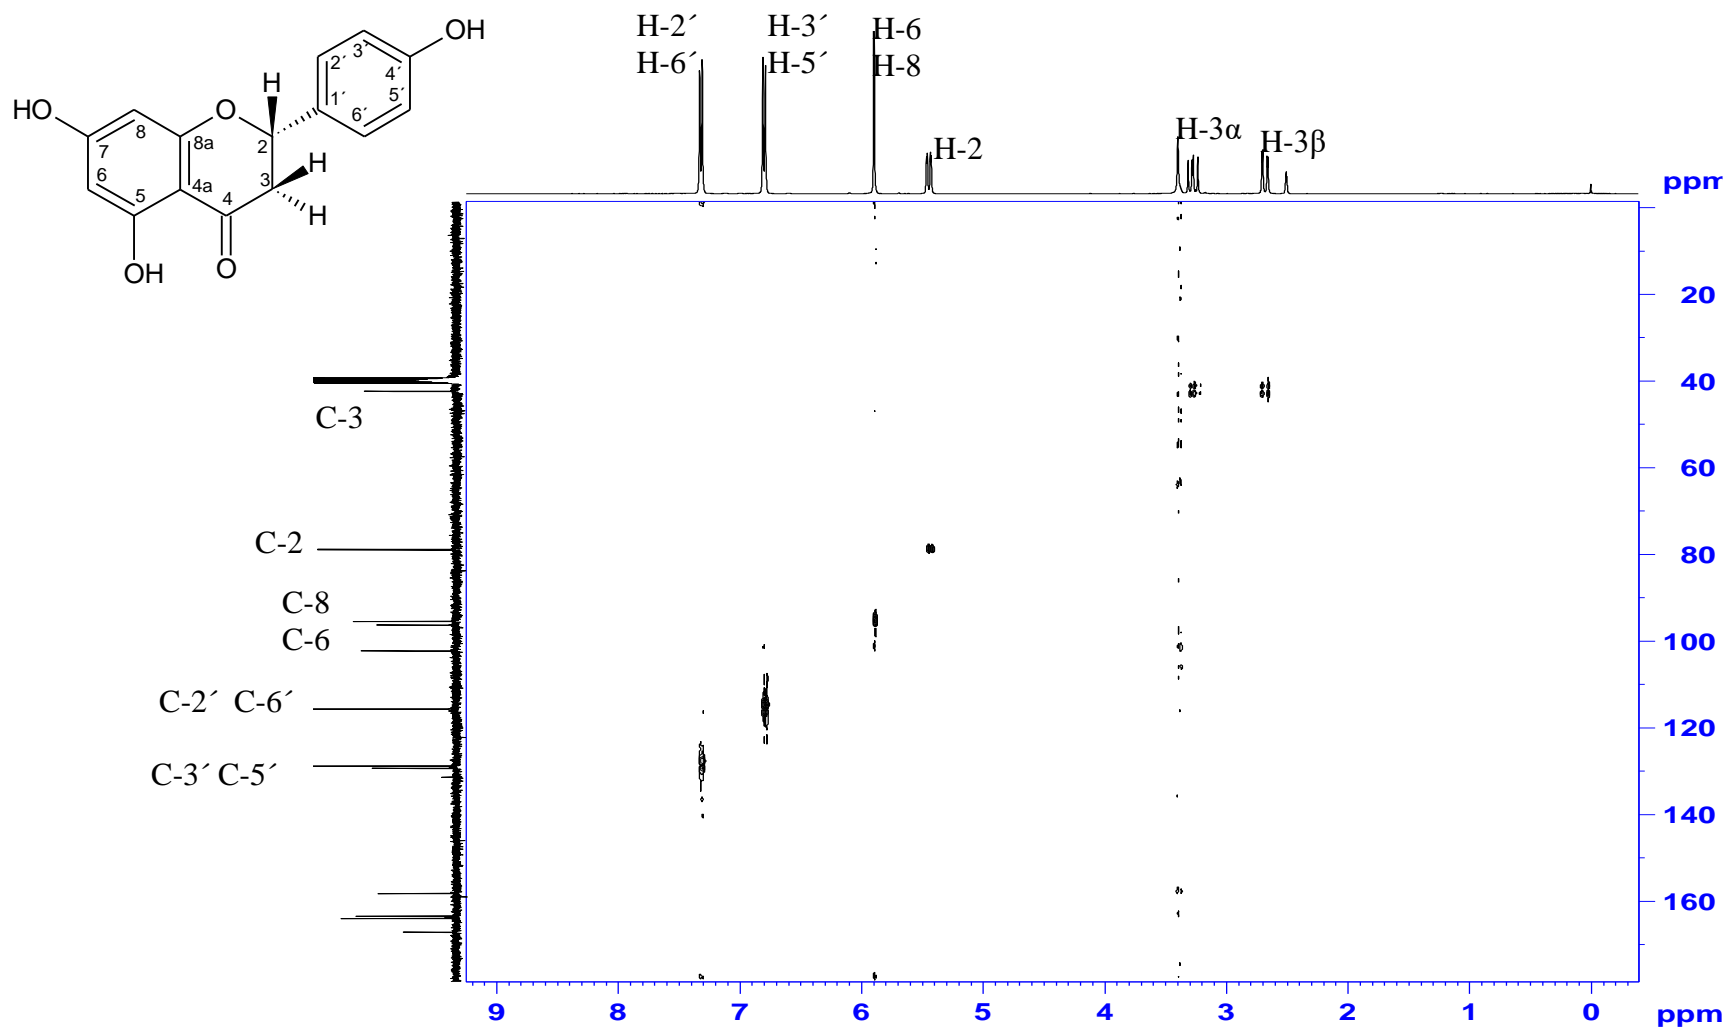

S26: IR spectrum of Pinocembrin 1

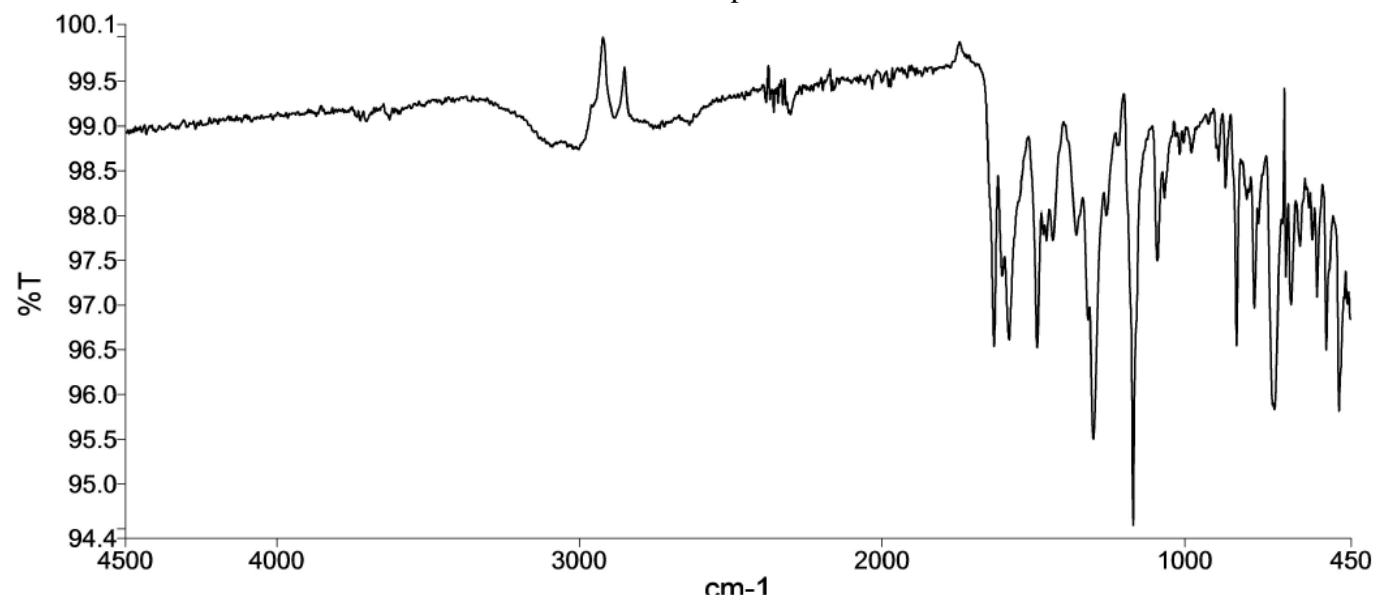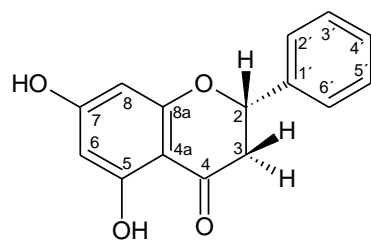

S27: IR spectrum of Sakuranetin 2

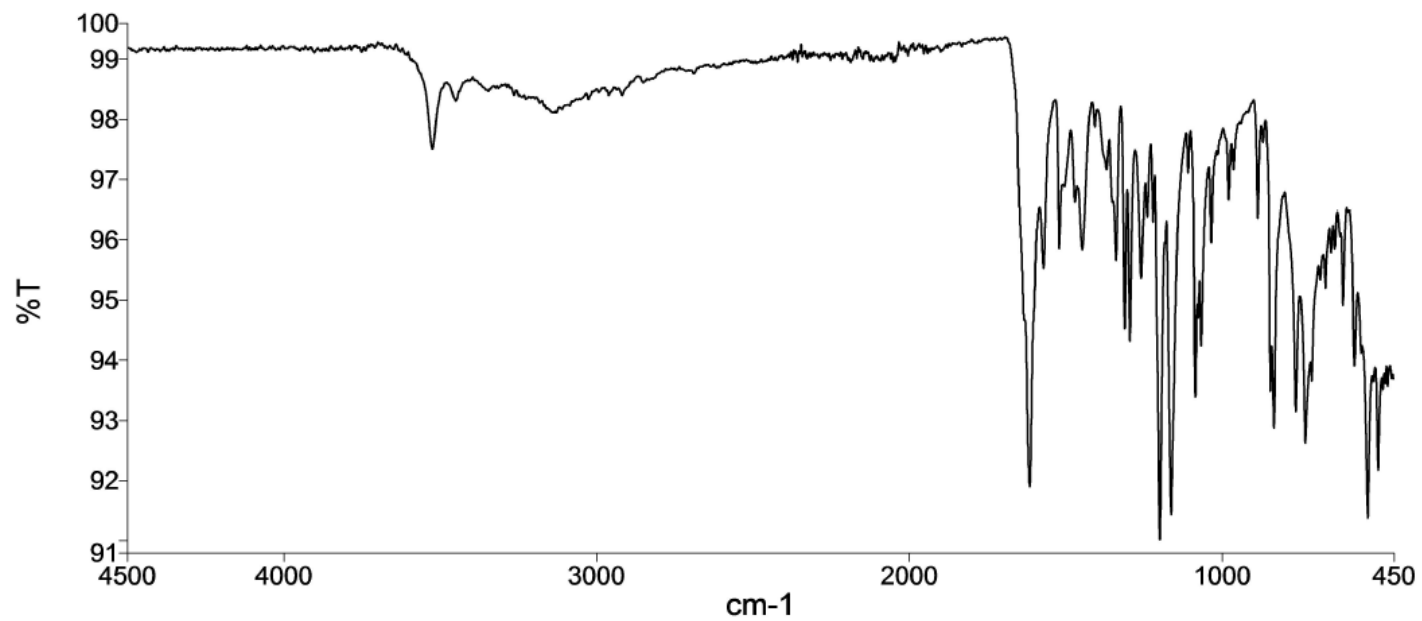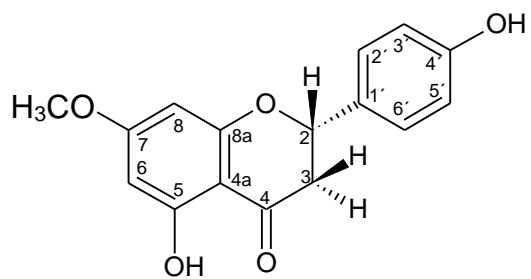

S28: IR spectrum of Cirsimaritin 3

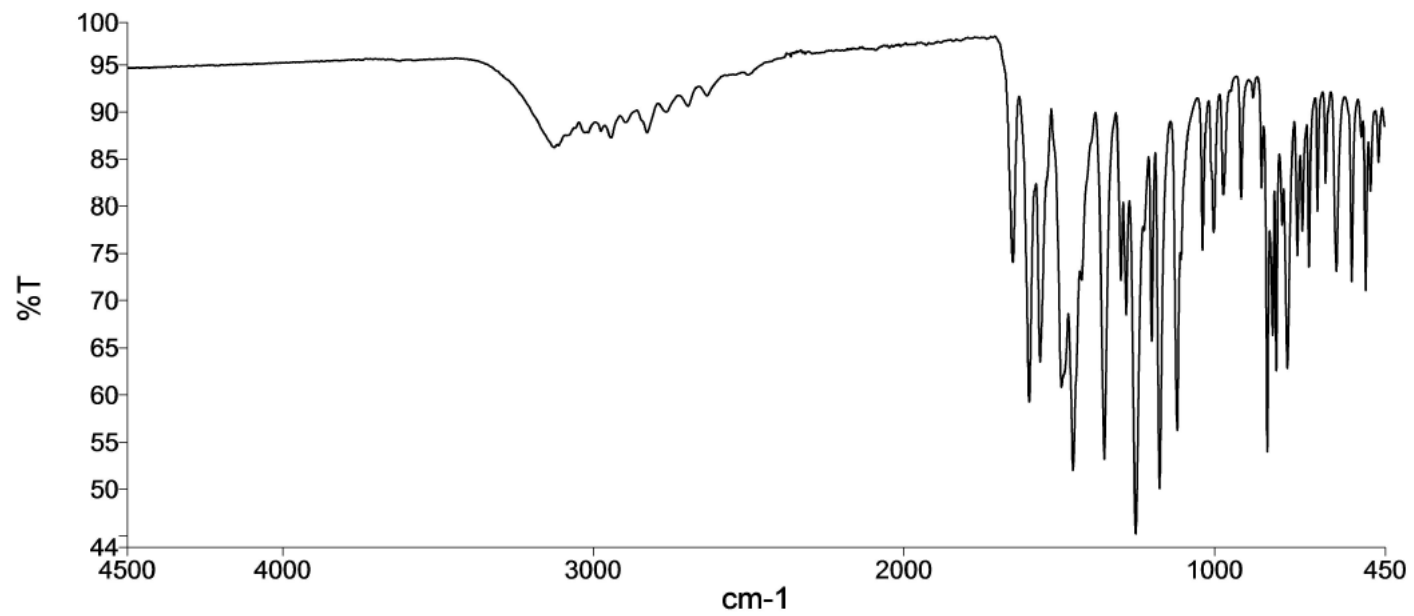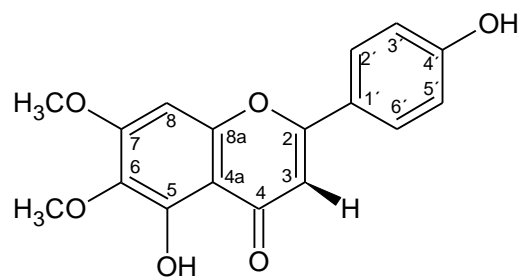

Table 1. <sup>1</sup>H-NMR spectral data of compounds 1-4 (400 MHz, DMSO-*d*<sub>6</sub>)

| Position                                   | $\delta$ in ppm (m, <i>J</i> in Hz) |                         |                |                         |
|--------------------------------------------|-------------------------------------|-------------------------|----------------|-------------------------|
|                                            | 1                                   | 2                       | 3              | 4                       |
| <b>2</b>                                   | 5.59 (dd, 12.71, 2.98)              | 5.49 (dd, 12.75, 2.86)  | -              | 5.44 (dd, 12.78, 2.88)  |
| <b>3<math>\alpha</math><sub>(ax)</sub></b> | 3.26 (dd, 17.10, 12.71)             | 3.33 (dd, 17.15, 12.75) | 6.84 (s)       | 3.27 (dd, 17.11, 12.78) |
| <b>3<math>\beta</math><sub>(ec)</sub></b>  | 2.78 (dd, 17.10, 2.98)              | 2.72 (dd, 17.15, 2.86)  | -              | 2.68 (dd, 17.11 2.88)   |
| <b>6</b>                                   | 5.94 (d, 1.70)                      | 6.11 (d, 2.09)          | -              | 5.89 (s)                |
| <b>8</b>                                   | 5.91 (d, 1.70)                      | 6.08 (d, 2.12)          | 6.91 (s)       | 5.89 (s)                |
| <b>2',6'</b>                               | 7.52 (d, 7.05)                      | 7.33 (d, 8.48)          | 7.96 (d, 8.61) | 7.32 (d, 8.48)          |
| <b>3',5'</b>                               | 7.45-7.37 (m)                       | 6.80 (d, 8.48)          | 6.94 (d, 8.61) | 6.80 (d, 8.48)          |
| <b>4'</b>                                  | 7.45-7.37 (m)                       | -                       | -              | -                       |
| <b>5-OH</b>                                | 12.14 (s)                           | 12.13 (s)               | 12.94 (s)      | 12.16 (s)               |
| <b>7-OH</b>                                | 10.88 (br. s)                       | -                       | -              | 10.76 (s)               |
| <b>4'-OH</b>                               | -                                   | 9.62 (s)                | 10.40 (s)      | 9.60 (s)                |
| <b>6-OCH<sub>3</sub></b>                   | -                                   | -                       | 3.93 (s)       | -                       |
| <b>7-OCH<sub>3</sub></b>                   | -                                   | 3.79 (s)                | 3.75 (s)       | -                       |

## S30

Table 2.  $^{13}\text{C}$ -NMR spectral data of compounds 1-4 (100 MHz,  $\text{DMSO-}d_6$ )

| Position           | $\delta$ in ppm |        |        |        |
|--------------------|-----------------|--------|--------|--------|
|                    | 1               | 2      | 3      | 4      |
| 2                  | 78.38           | 78.63  | 164.47 | 78.88  |
| 3                  | 42.10           | 42.03  | 103.11 | 42.43  |
| 4                  | 195.95          | 196.99 | 182.64 | 196.89 |
| 4a                 | 101.80          | 102.60 | 105.50 | 102.33 |
| 5                  | 163.50          | 163.21 | 153.04 | 163.95 |
| 6                  | 95.05           | 93.79  | 132.30 | 95.42  |
| 7                  | 166.74          | 167.43 | 159.03 | 167.08 |
| 8                  | 95.94           | 94.65  | 91.96  | 96.24  |
| 8a                 | 162.72          | 162.89 | 152.52 | 163.40 |
| 1'                 | 138.70          | 128.69 | 121.55 | 129.31 |
| 2', 6'             | 126.62          | 128.39 | 128.94 | 128.79 |
| 3', 5'             | 128.55          | 115.17 | 116.40 | 115.62 |
| 4'                 | 128.55          | 157.78 | 161.73 | 158.19 |
| 6-OCH <sub>3</sub> |                 |        | 60.46  |        |
| 7-OCH <sub>3</sub> |                 | 55.89  | 56.85  |        |
